# Supplementary material for: Ionizing radiation triggers mitophagy to enhance DNA damage in cancer cells
Source: Springer Nature journal article supplement (doi:10.1038/s41420-023-01573-0), 2023-07-28
Supplement: MOESM3 [file 41420_2023_1573_MOESM3_ESM.pdf]

Full and uncropped western blot for Figure 1D

Lanes 1-8 are on the figure

PANC-1      SW1990

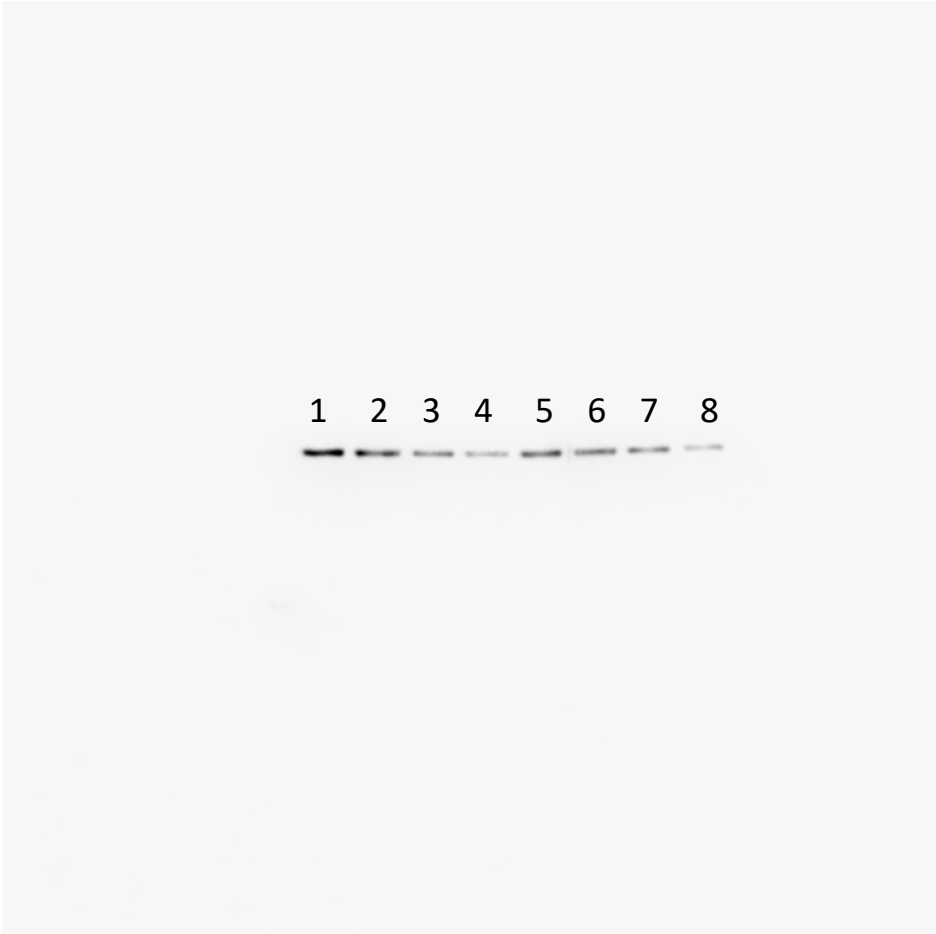

← KI67

Full and uncropped western blot for Figure 1D

Lanes 1-8 are on the figure

PANC-1      SW1990

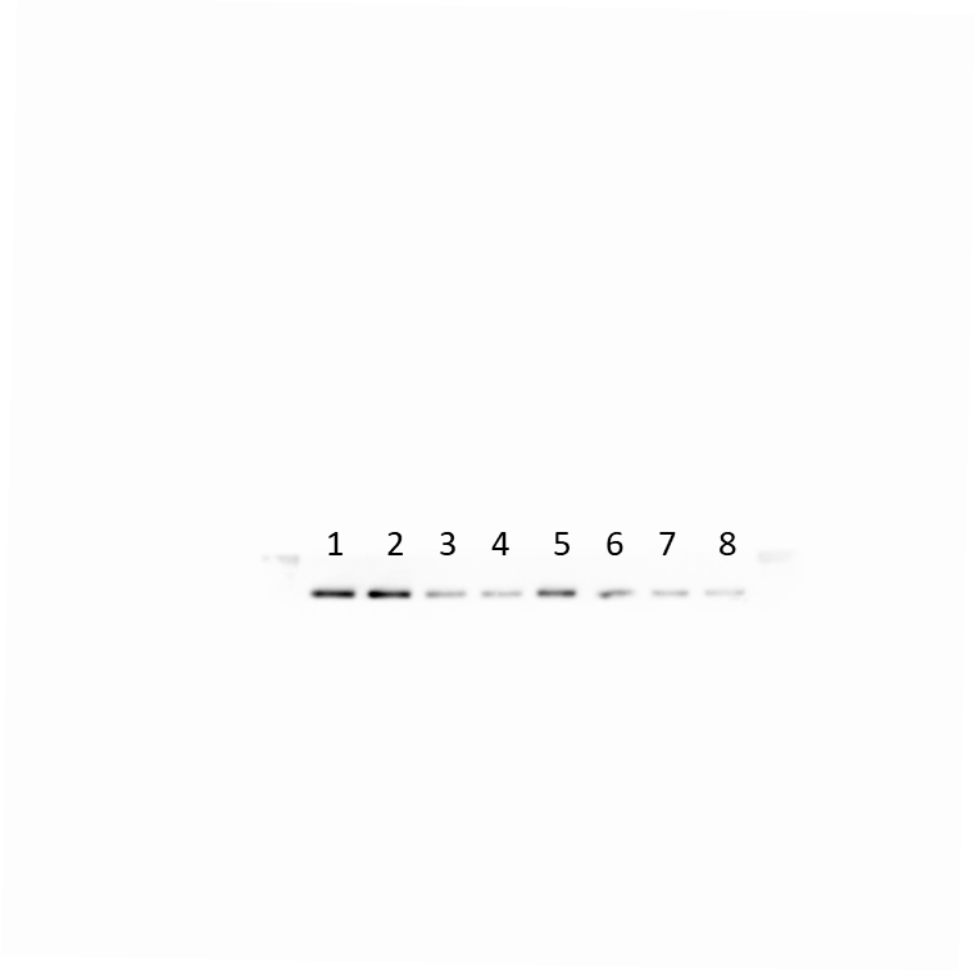

← C-Myc

Full and uncropped western blot for Figure 1D

Lanes 1-8 are on the figure

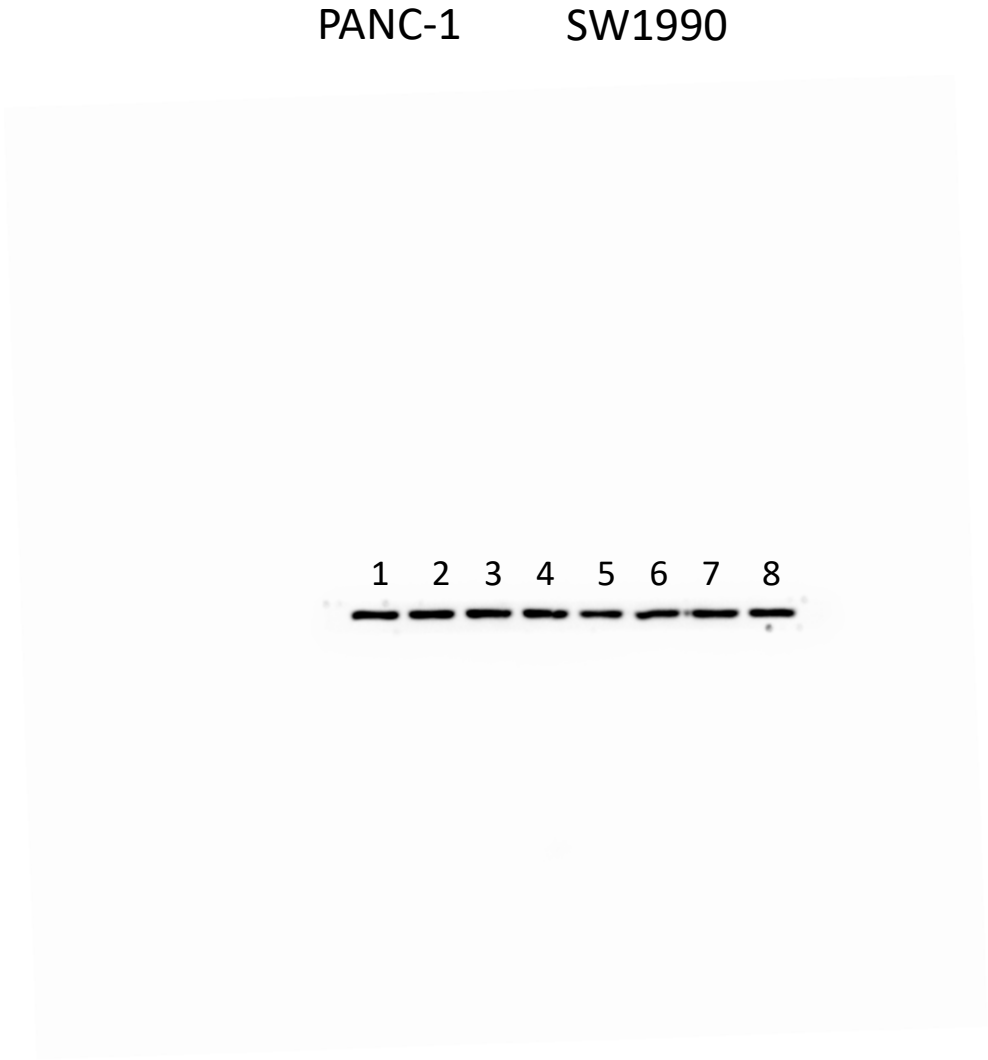

← GAPDH

Full and uncropped western blot for Figure 1D

Lanes 1-8 are on the figure

B16

S91

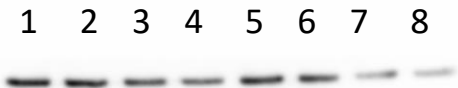

← Ki67

Full and uncropped western blot for Figure 1D

Lanes 1-8 are on the figure

B16                      S91

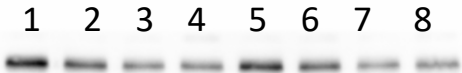

← C-Myc

Full and uncropped western blot for Figure 1D

Lanes 1-8 are on the figure

B16

S91

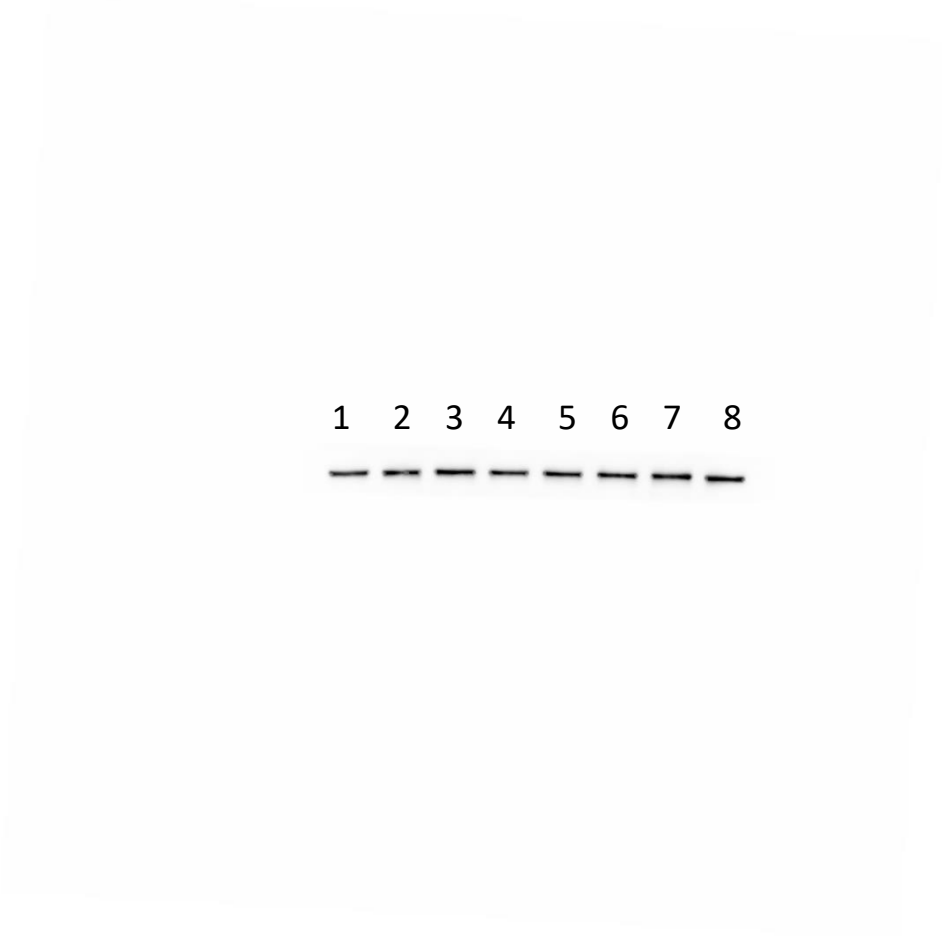

1 2 3 4 5 6 7 8

← GAPDH

Full and uncropped western blot for Figure 2B

Lanes 1-8 are on the figure

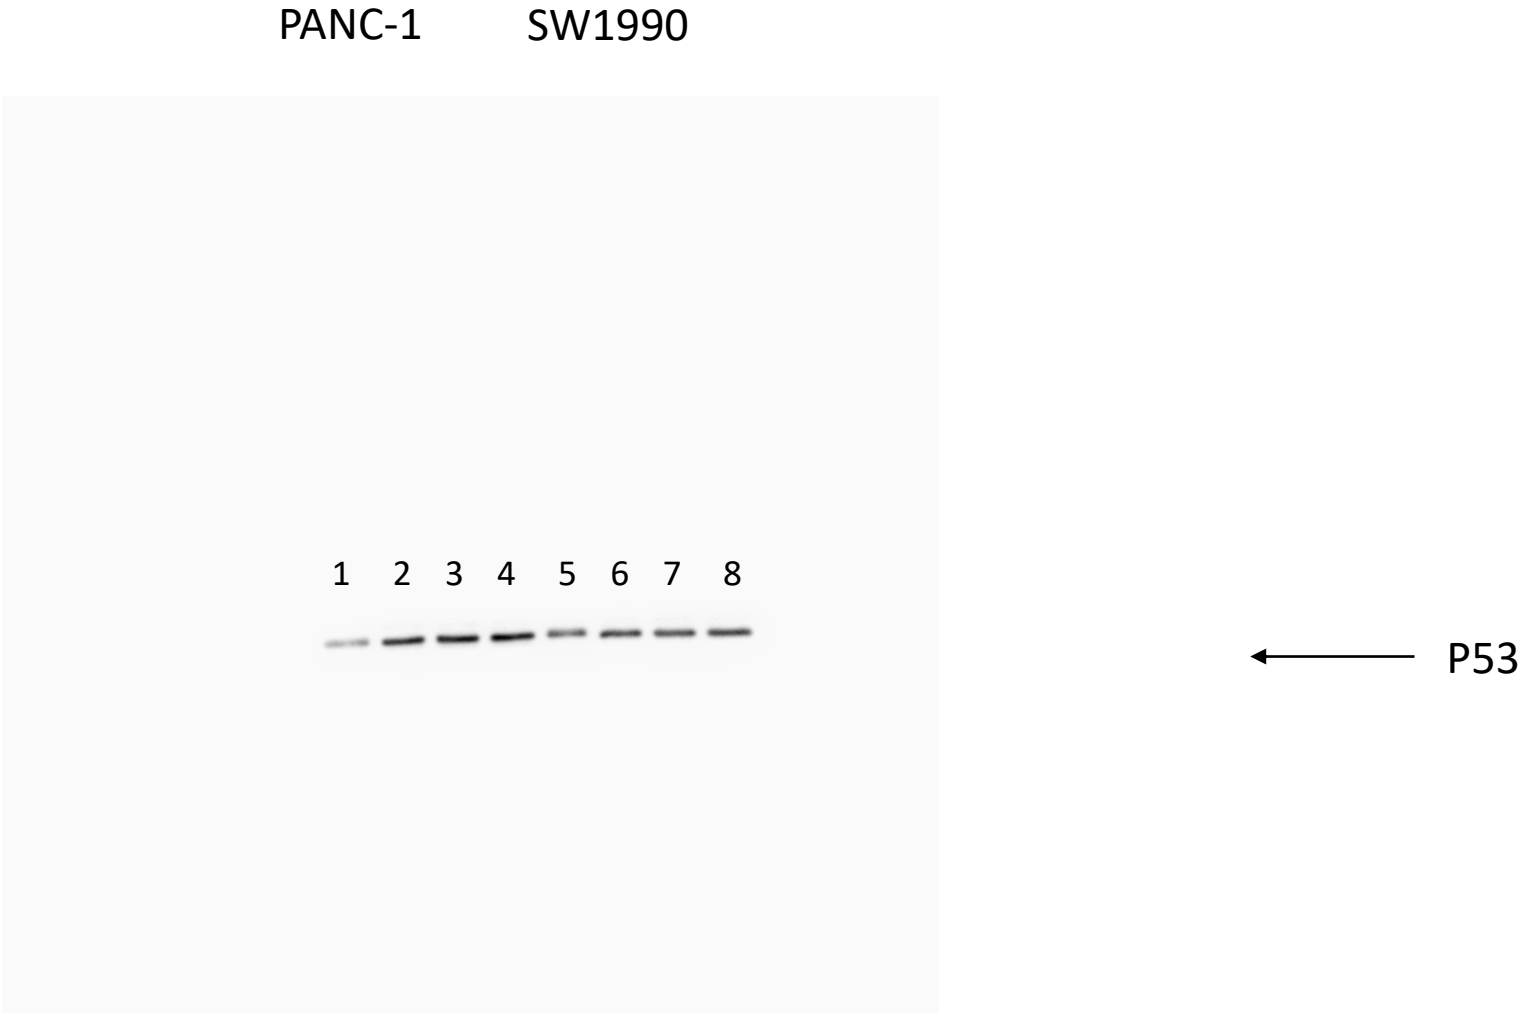

Full and uncropped western blot for Figure 2B

Lanes 1-8 are on the figure

PANC-1      SW1990

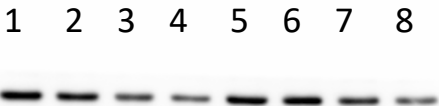

← Cyclin B1



Full and uncropped western blot for Figure 2B

Lanes 1-8 are on the figure

PANC-1      SW1990

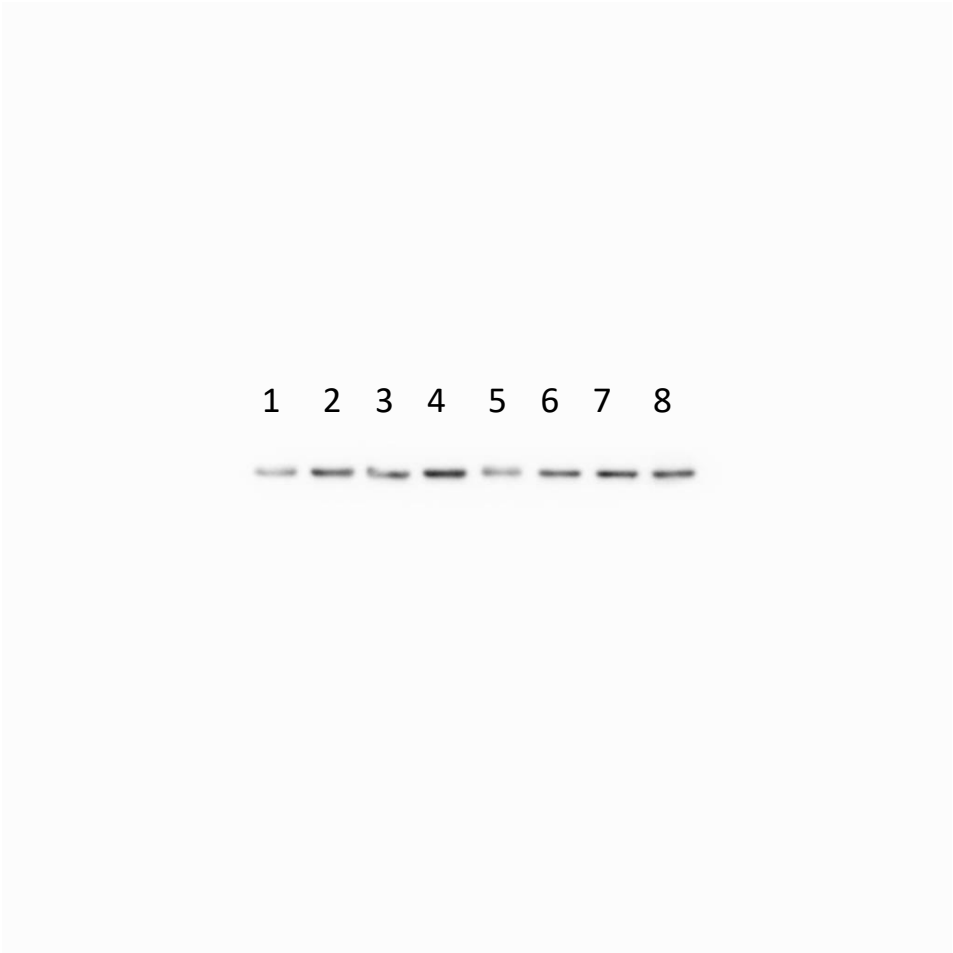

← P21

Full and uncropped western blot for Figure 2B

Lanes 1-8 are on the figure

PANC-1      SW1990

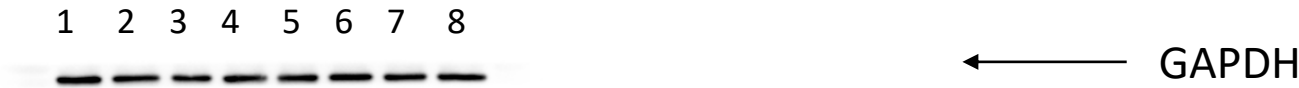

Full and uncropped western blot for Figure 2C

Lanes 1-8 are on the figure

PANC-1      SW1990

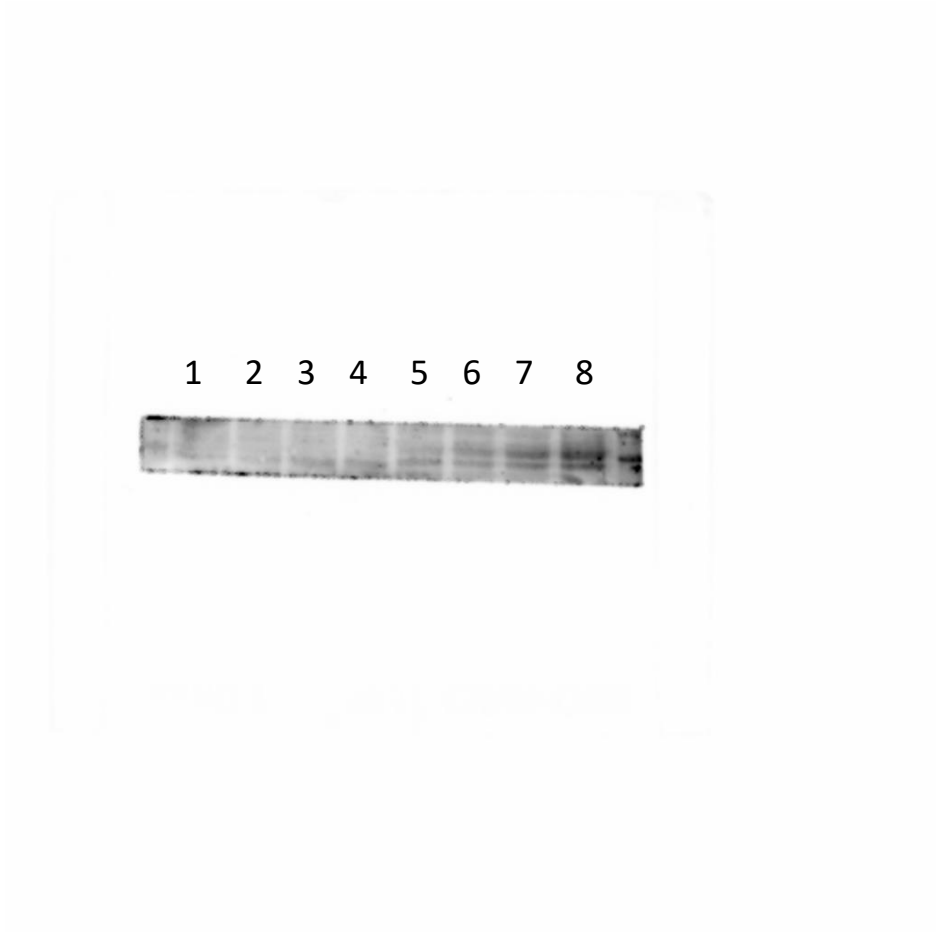

← p-ATR

Full and uncropped western blot for Figure 2C

Lanes 1-8 are on the figure

PANC-1      SW1990

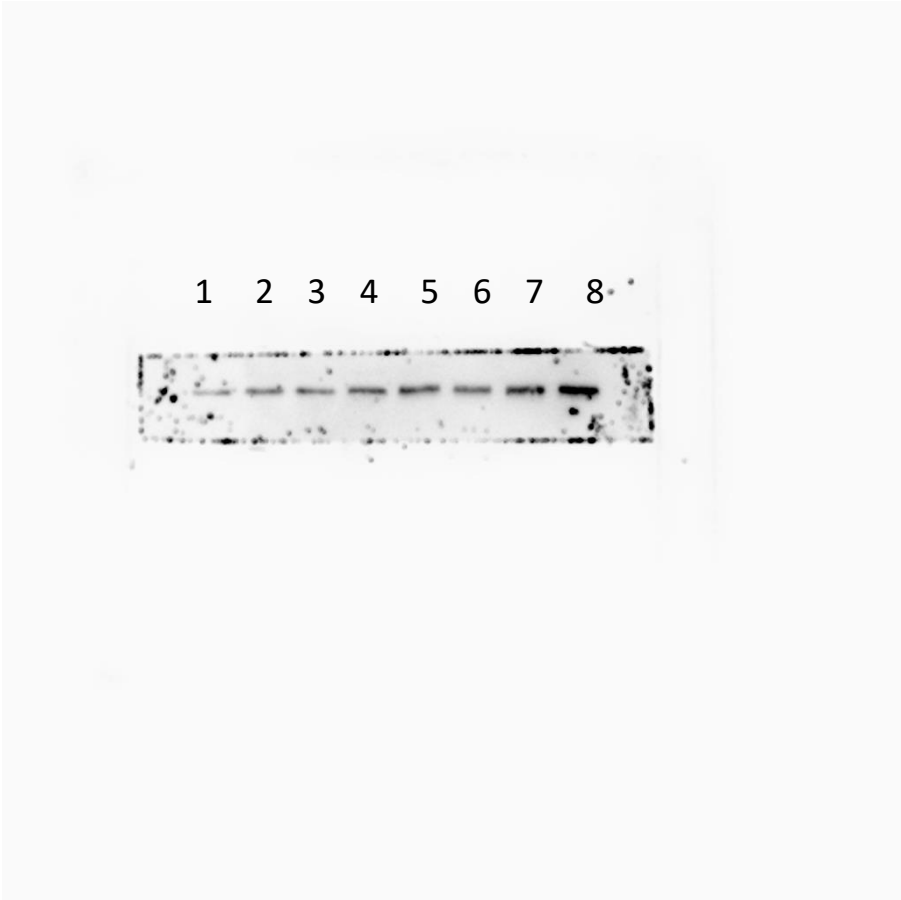

← ATR

Full and uncropped western blot for Figure 2C

Lanes 1-8 are on the figure

PANC-1      SW1990

1   2   3   4   5   6   7   8

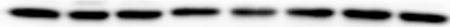

← GAPDH

Full and uncropped western blot for Figure 2D

Lanes 1-8 are on the figure

PANC-1      SW1990

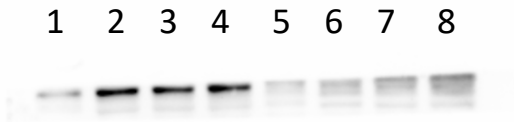

← p-CHK1

Full and uncropped western blot for Figure 2D

Lanes 1-8 are on the figure

PANC-1      SW1990

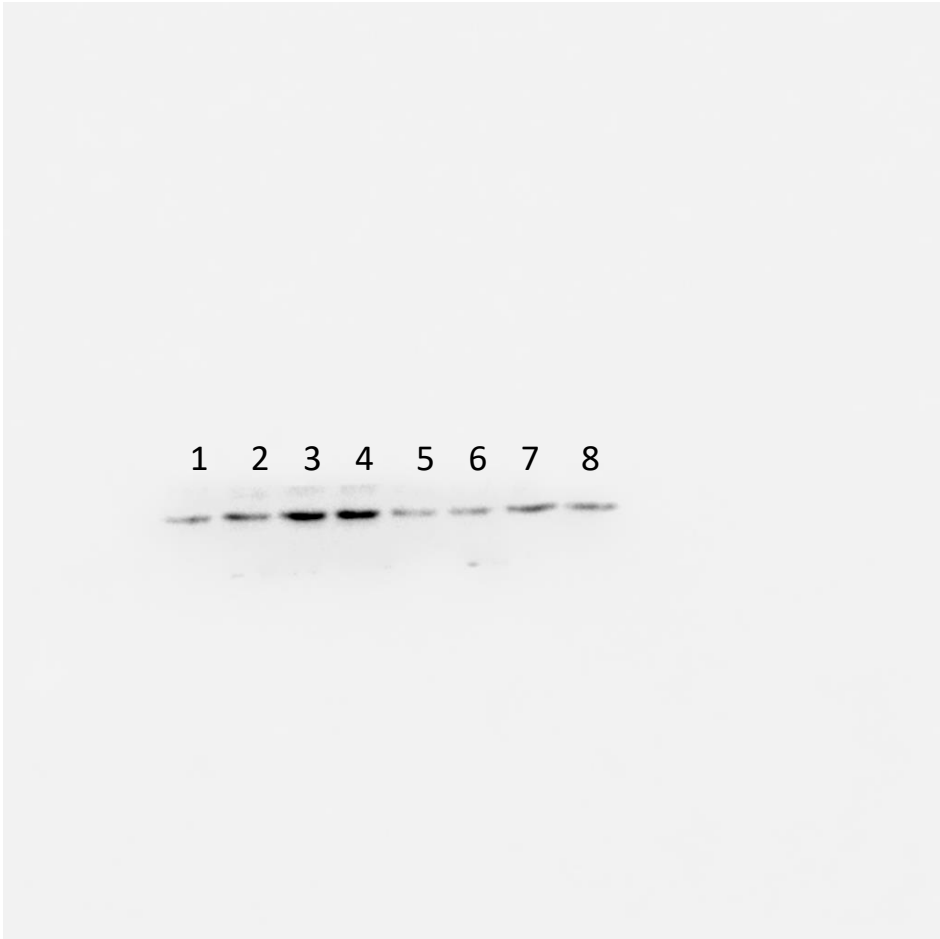

← CHK1

Full and uncropped western blot for Figure 2D

Lanes 1-8 are on the figure

PANC-1      SW1990

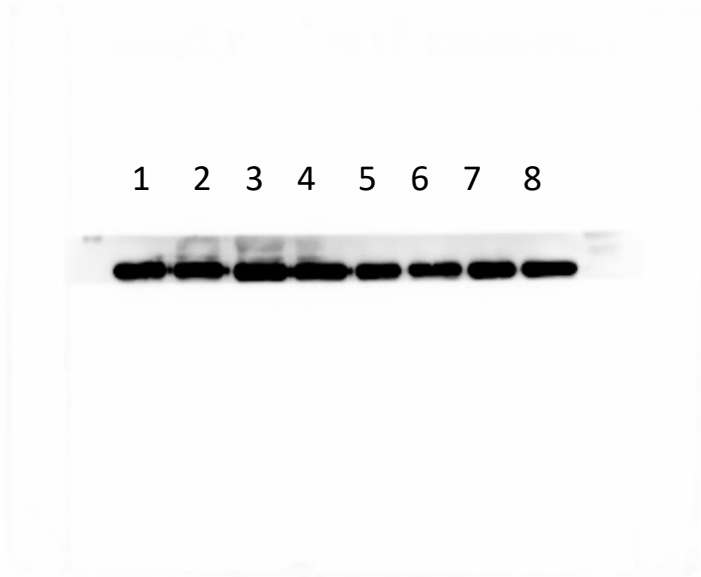

← GAPDH



Full and uncropped western blot for Figure 2E

Lanes 1-8 are on the figure

PANC-1      SW1990

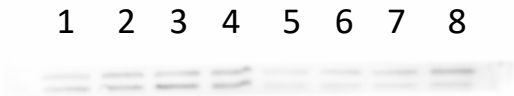

← P-ATM

Full and uncropped western blot for Figure 2E

Lanes 1-8 are on the figure

PANC-1      SW1990

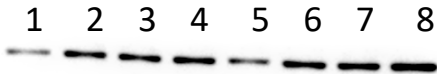

← ATM

Full and uncropped western blot for Figure 2E

Lanes 1-8 are on the figure

PANC-1      SW1990

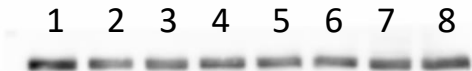

← GAPDH

Full and uncropped western blot for Figure 2F

Lanes 1-8 are on the figure

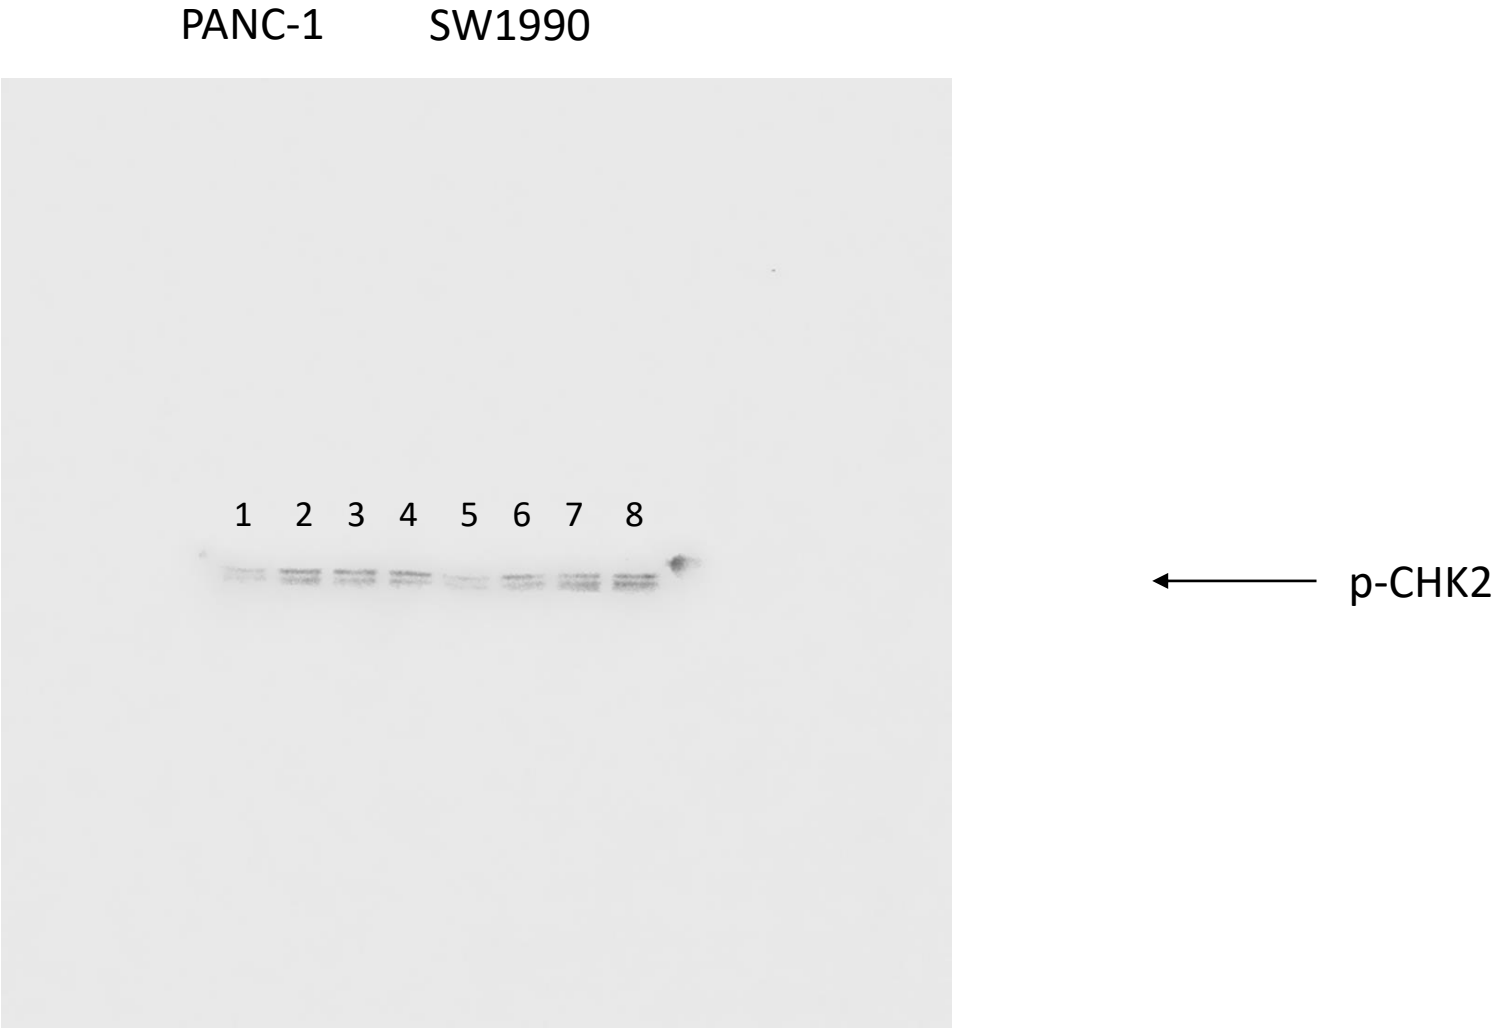

Full and uncropped western blot for Figure 2F

Lanes 1-8 are on the figure

PANC-1      SW1990

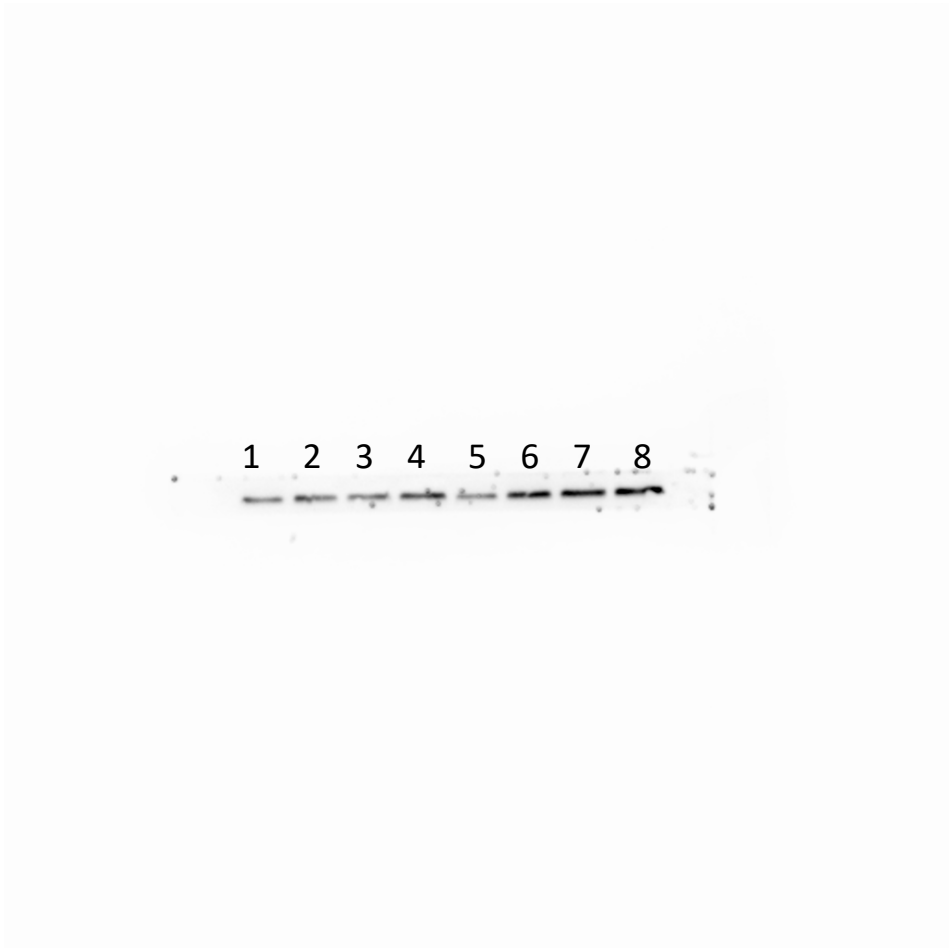

← CHK2

Full and uncropped western blot for Figure 2F

Lanes 1-8 are on the figure

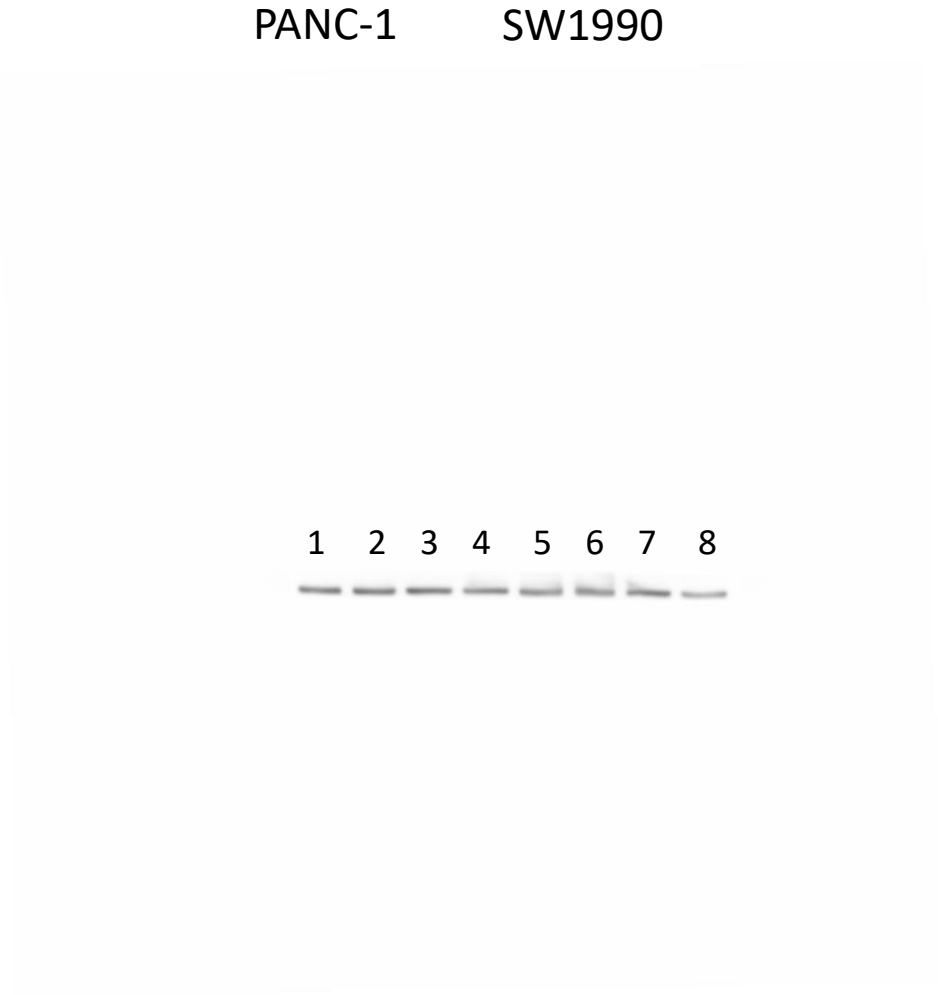

← GAPDH

Full and uncropped western blot for Figure 2G

Lanes 1-8 are on the figure

PANC-1      SW1990

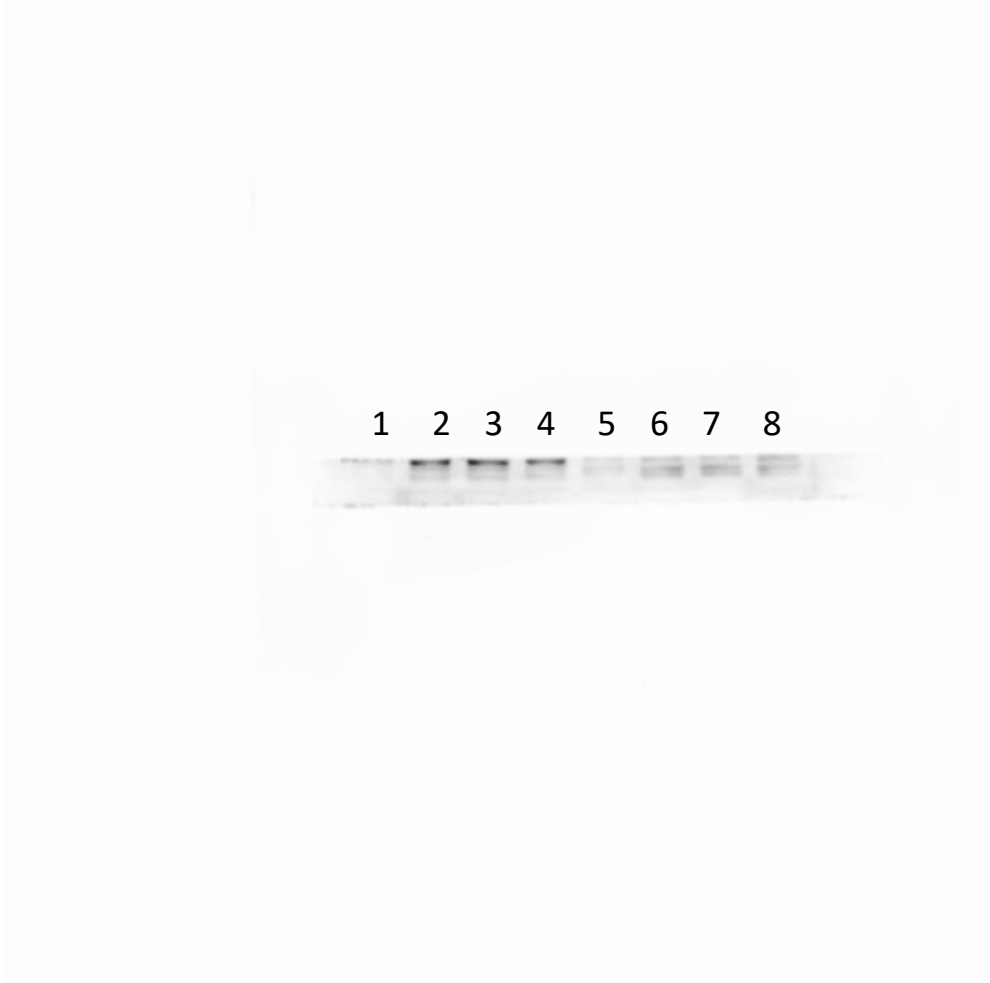

← P-BRCA1

Full and uncropped western blot for Figure 2G

Lanes 1-8 are on the figure

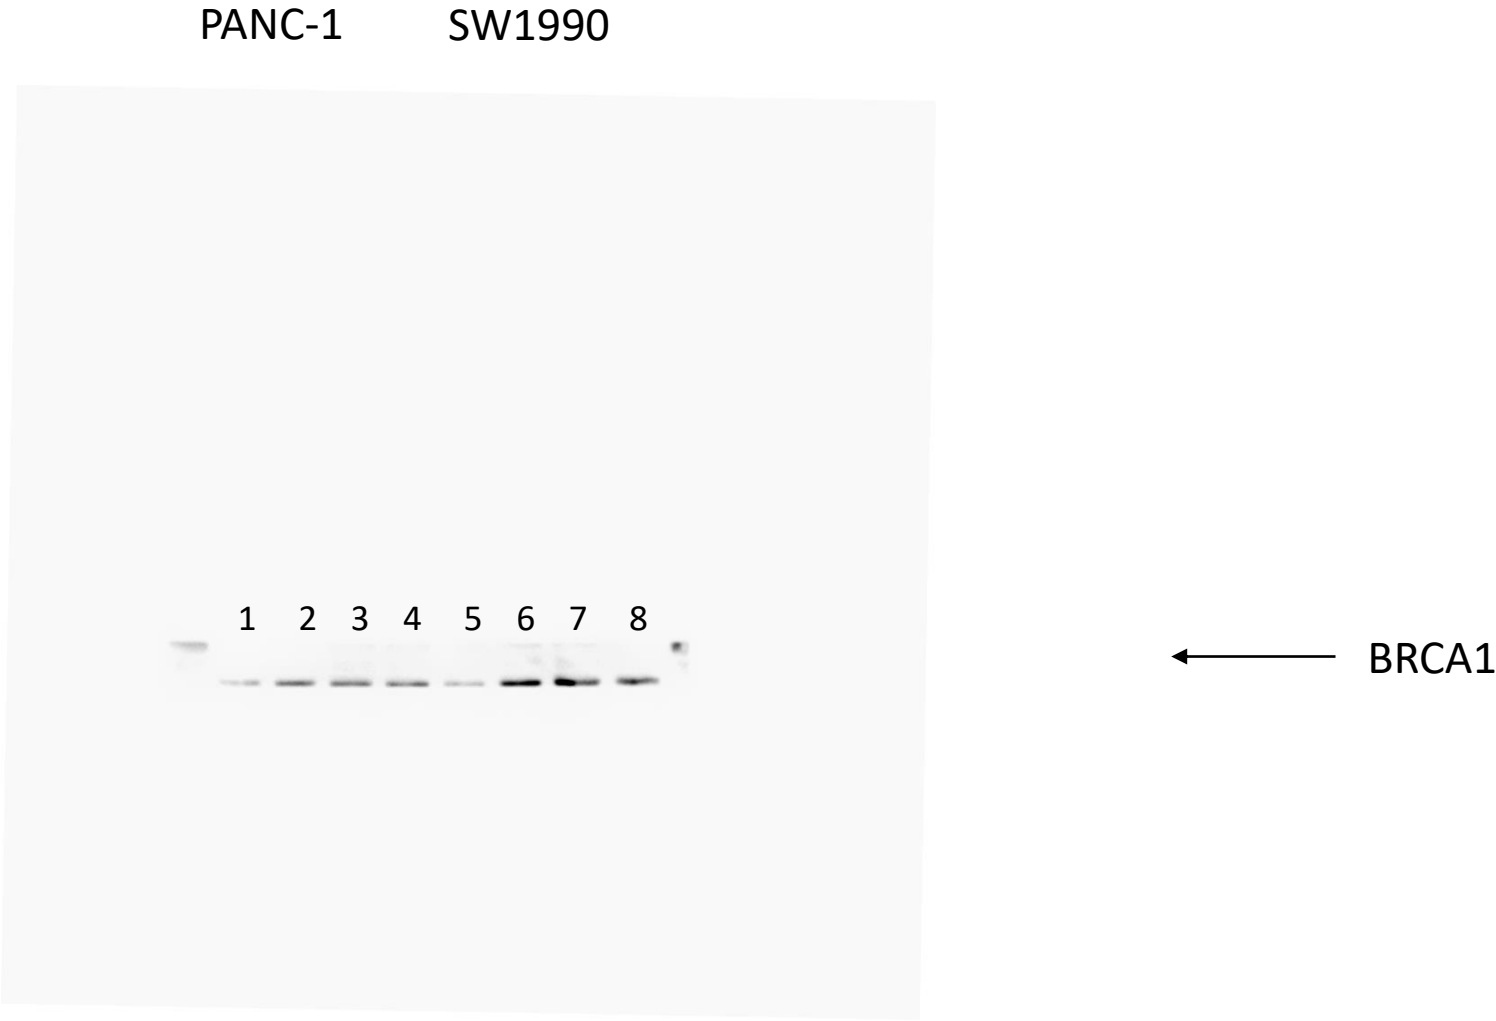



Full and uncropped western blot for Figure 2G

Lanes 1-8 are on the figure

PANC-1      SW1990

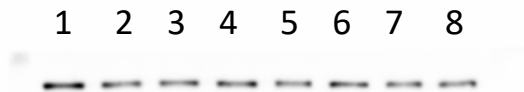

← GAPDH

Full and uncropped western blot for Figure 2N

Lanes 1-8 are on the figure

PANC-1      SW1990

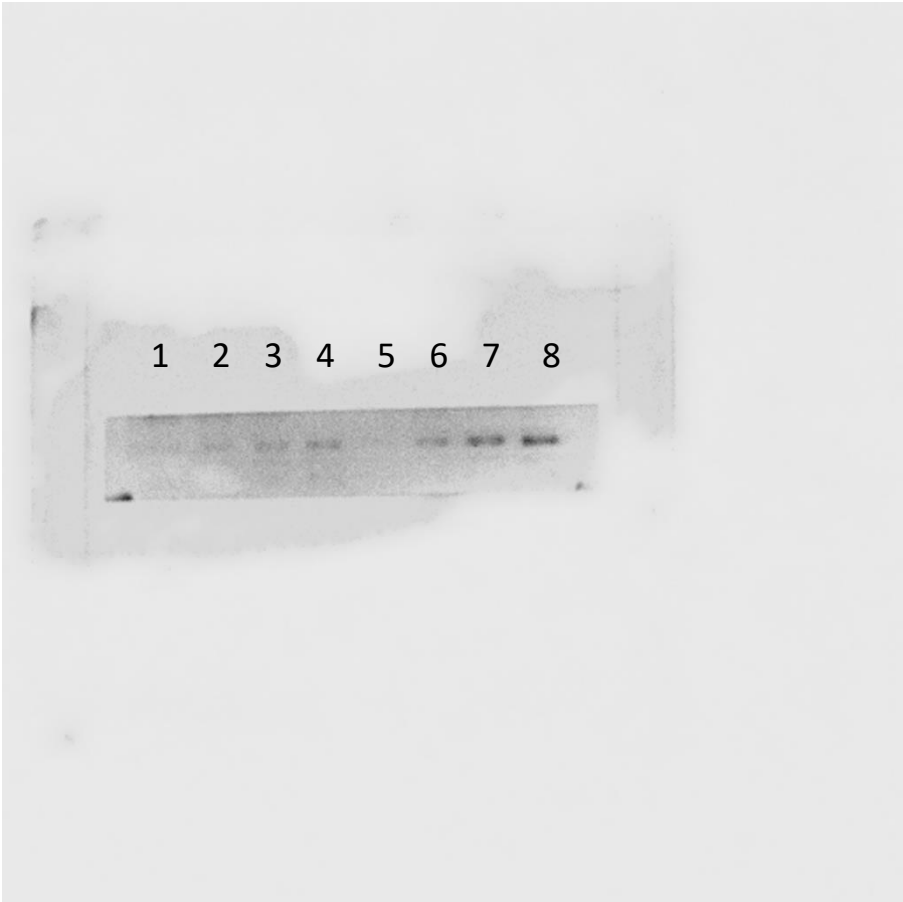

←  $\gamma$ -H2AX

Full and uncropped western blot for Figure 2N

Lanes 1-8 are on the figure

PANC-1      SW1990

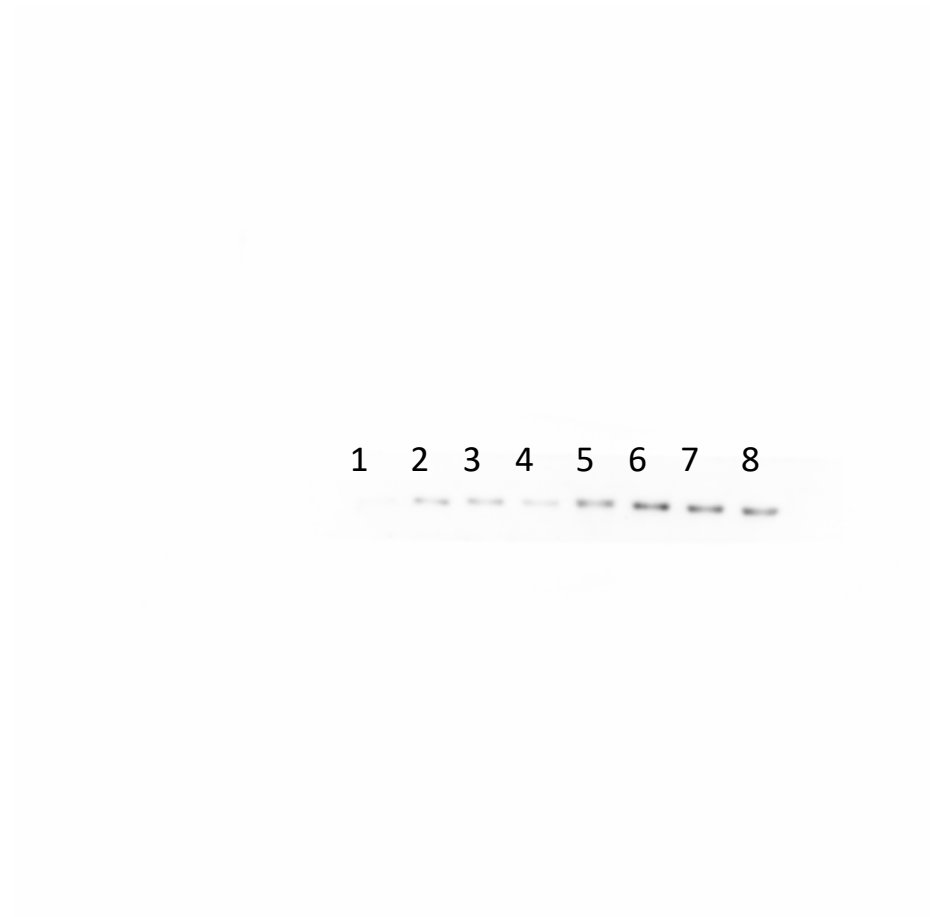

← 53BP1

Full and uncropped western blot for Figure 2N

Lanes 1-8 are on the figure

PANC-1      SW1990

1   2   3   4   5   6   7   8

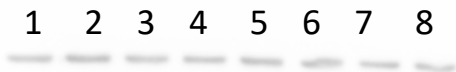

← GAPDH

Full and uncropped western blot for Figure 2N

Lanes 1-8 are on the figure

PANC-1      SW1990

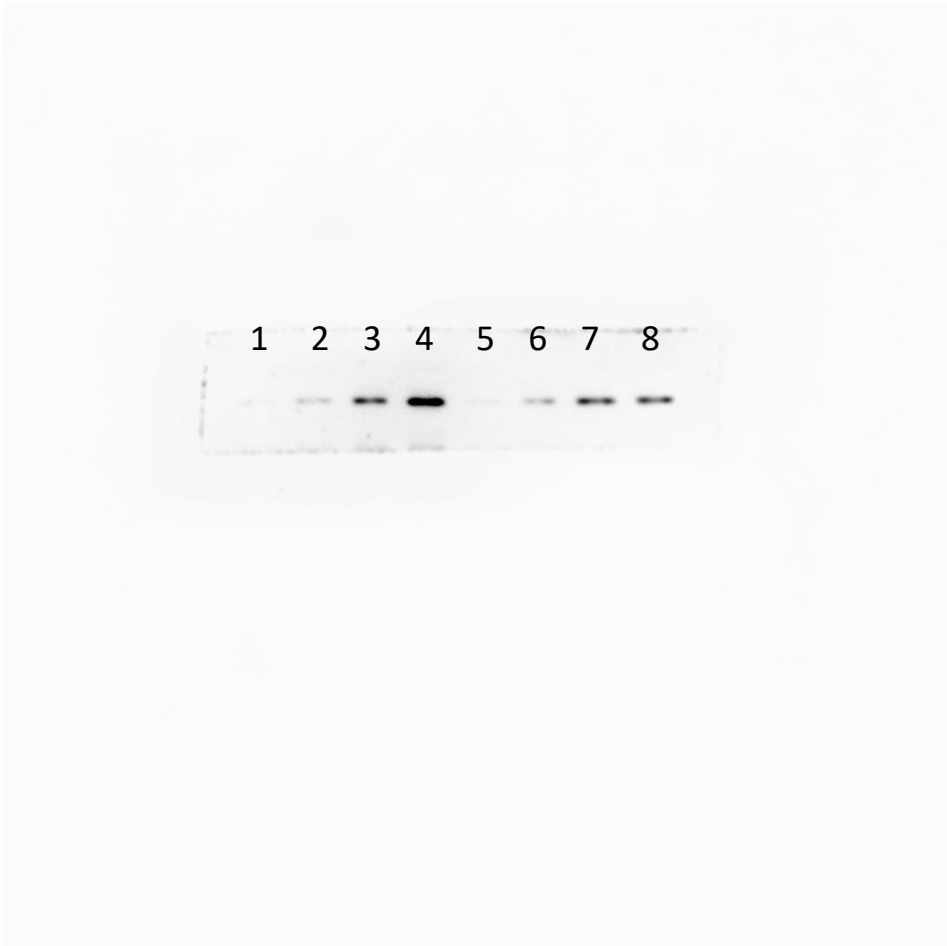

← PARP

Full and uncropped western blot for Figure 2N

Lanes 1-8 are on the figure

PANC-1      SW1990

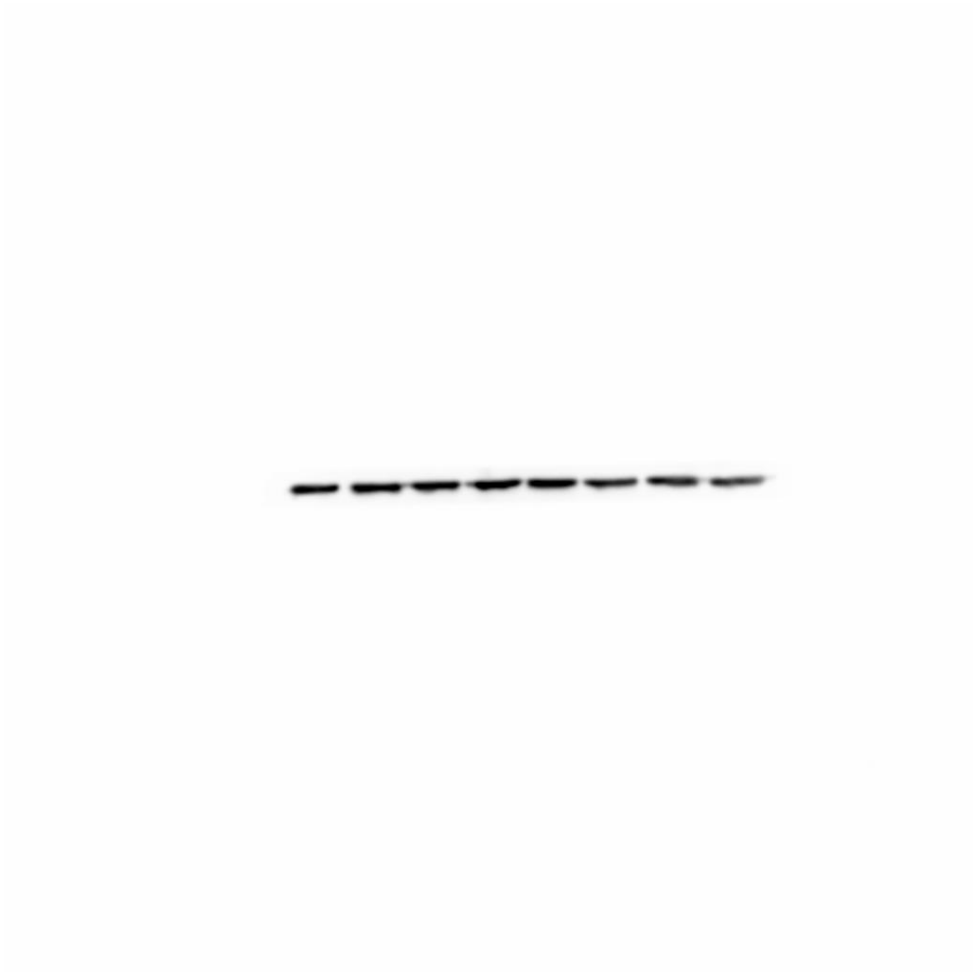

← GAPDH

Full and uncropped western blot for Figure 3F

Lanes 1-8 are on the figure

PANC-1      SW1990

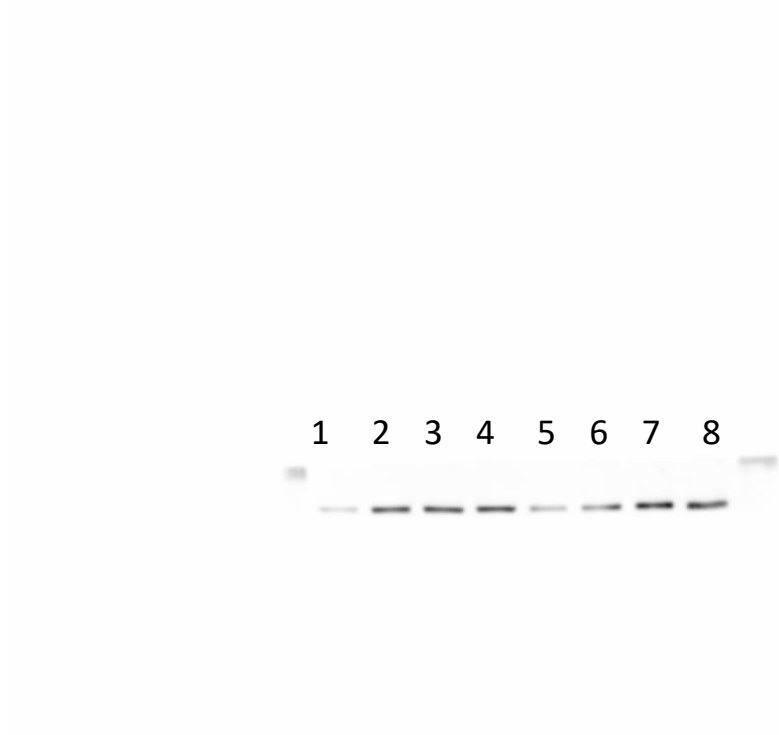

← BECLIN1

Full and uncropped western blot for Figure 3F

Lanes 1-8 are on the figure

PANC-1      SW1990

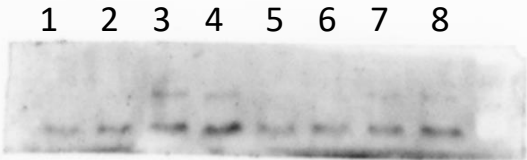

← LC3B



Full and uncropped western blot for Figure 3F

Lanes 1-8 are on the figure

PANC-1      SW1990

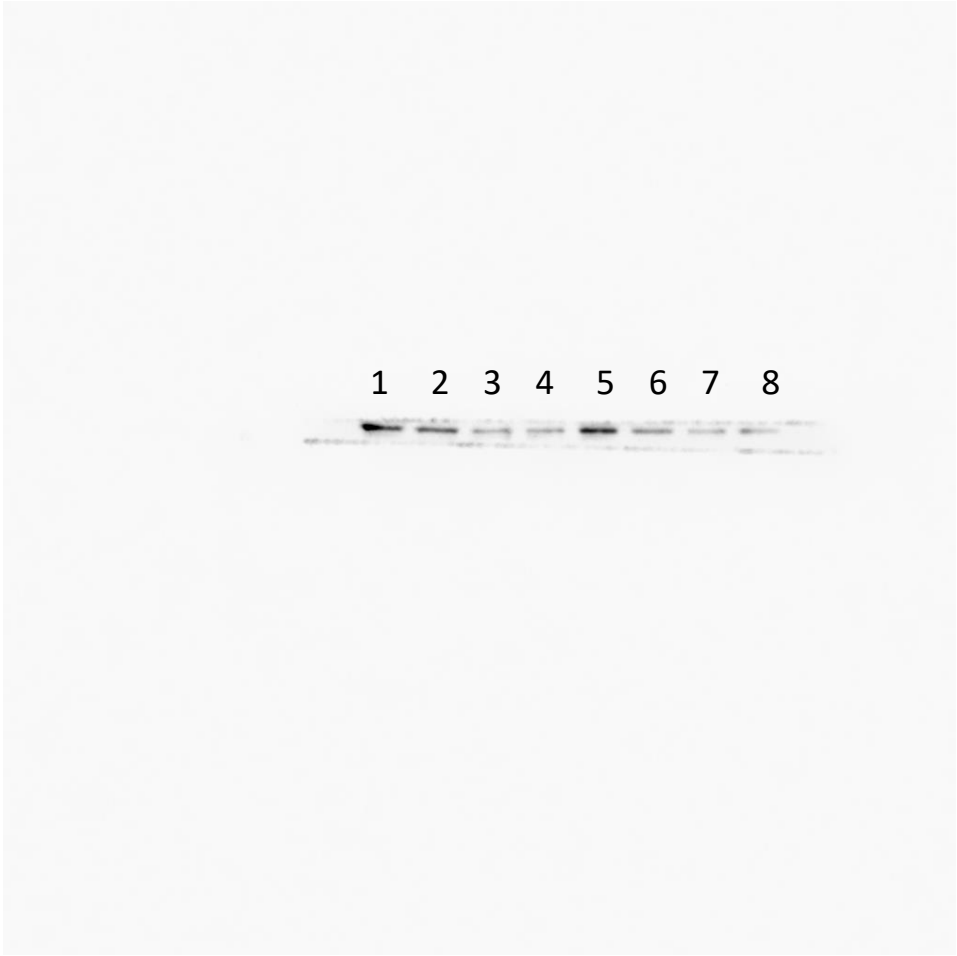

← P62

Full and uncropped western blot for Figure 3F

Lanes 1-8 are on the figure

PANC-1      SW1990

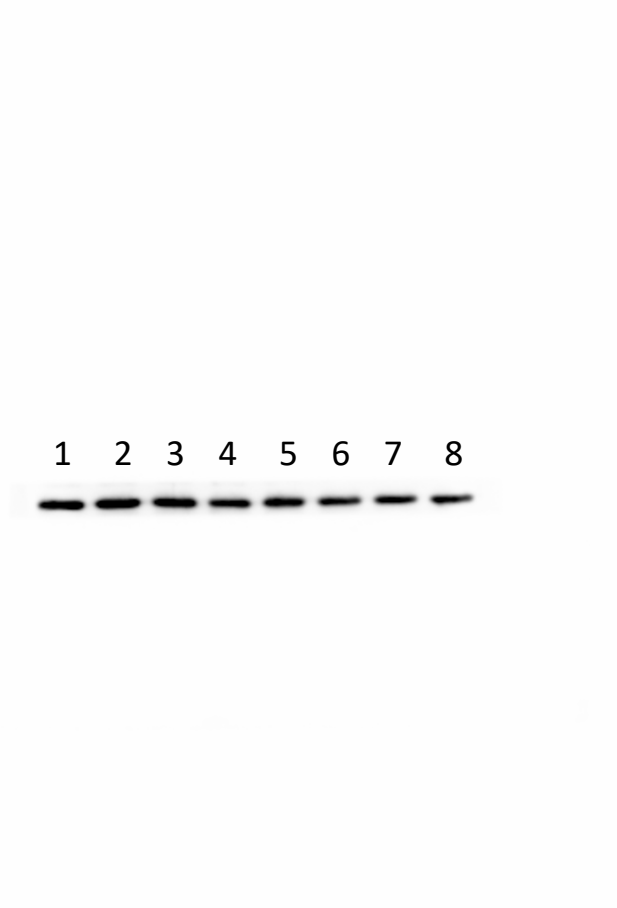

← GAPDH

Full and uncropped western blot for Figure 3G

Lanes 1-8 are on the figure

PANC-1      SW1990

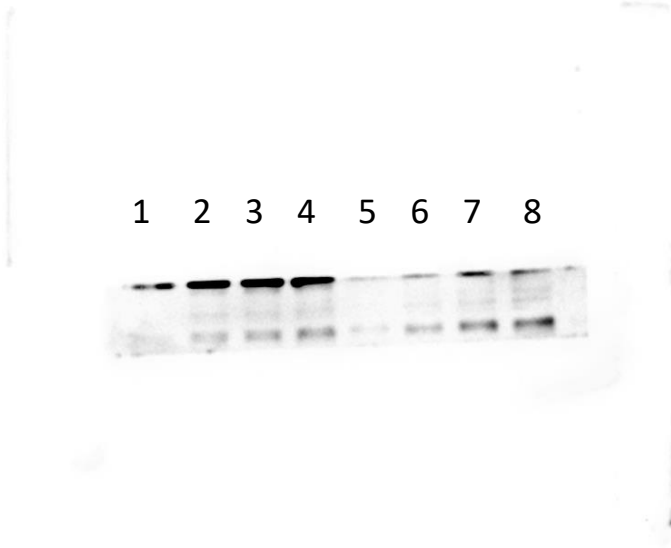

← LAMP1

Full and uncropped western blot for Figure 3G

Lanes 1-8 are on the figure

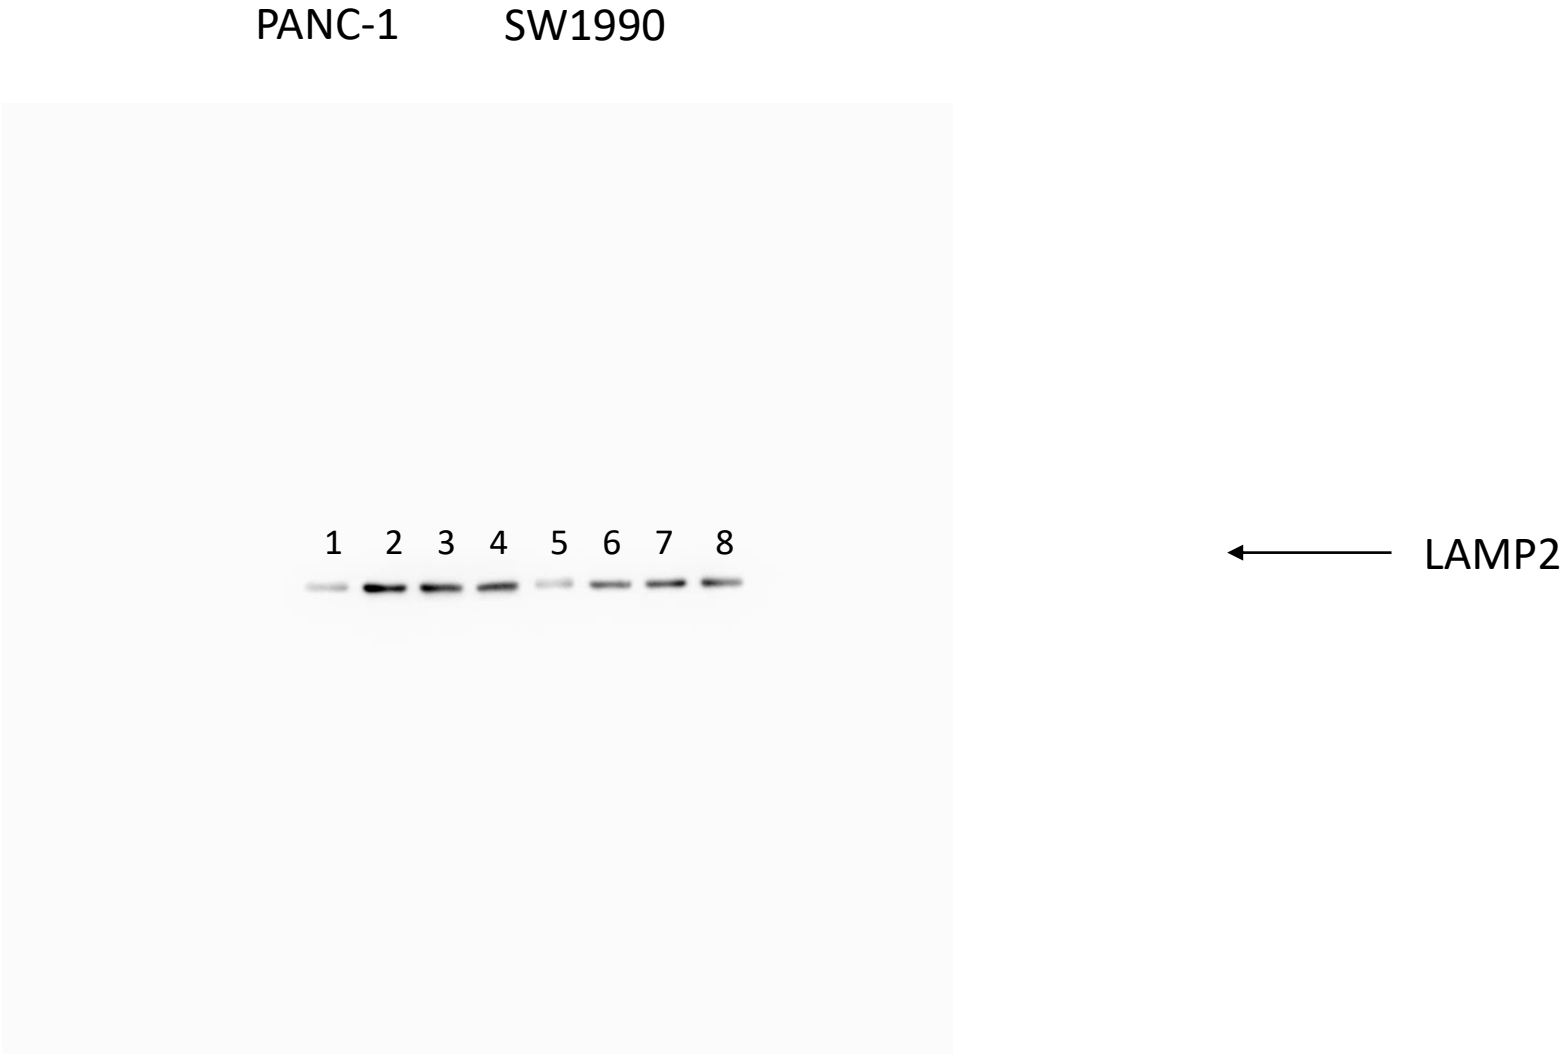

Full and uncropped western blot for Figure 3G

Lanes 1-8 are on the figure

PANC-1      SW1990

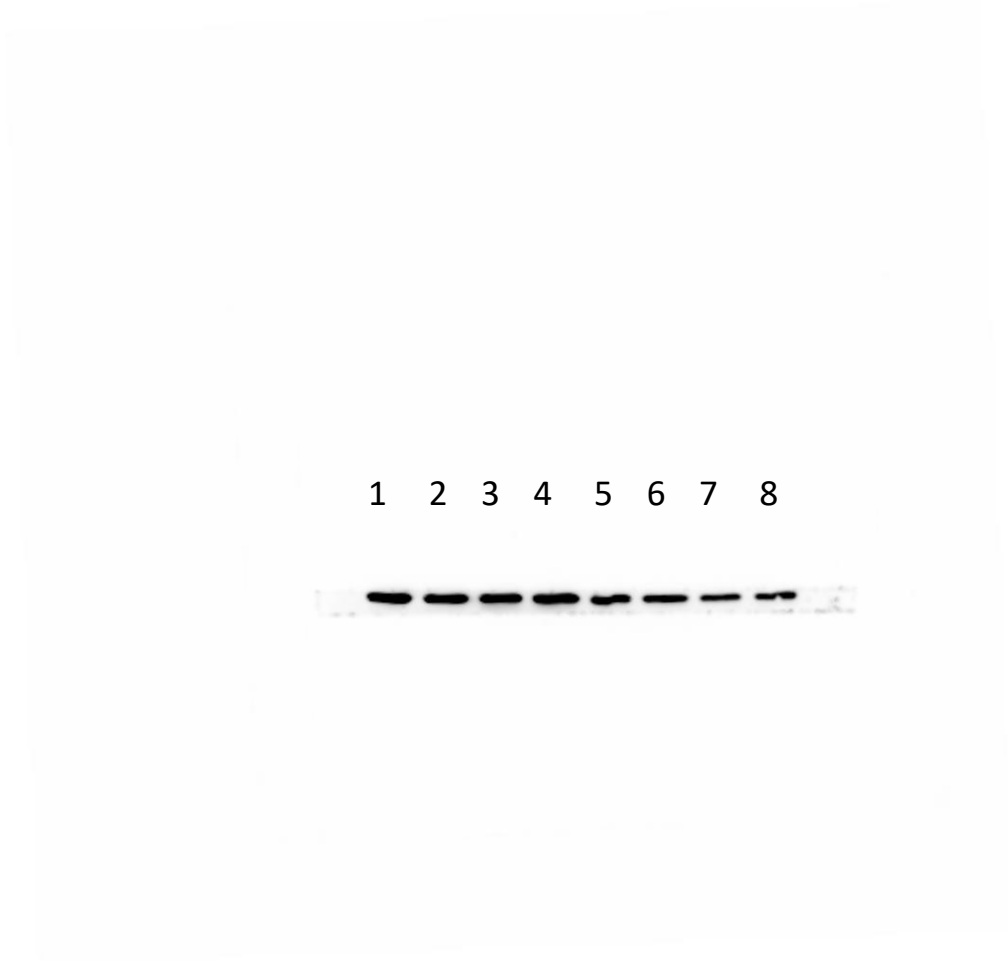

← GAPDH

Full and uncropped western blot for Figure 3H

Lanes 1-8 are on the figure

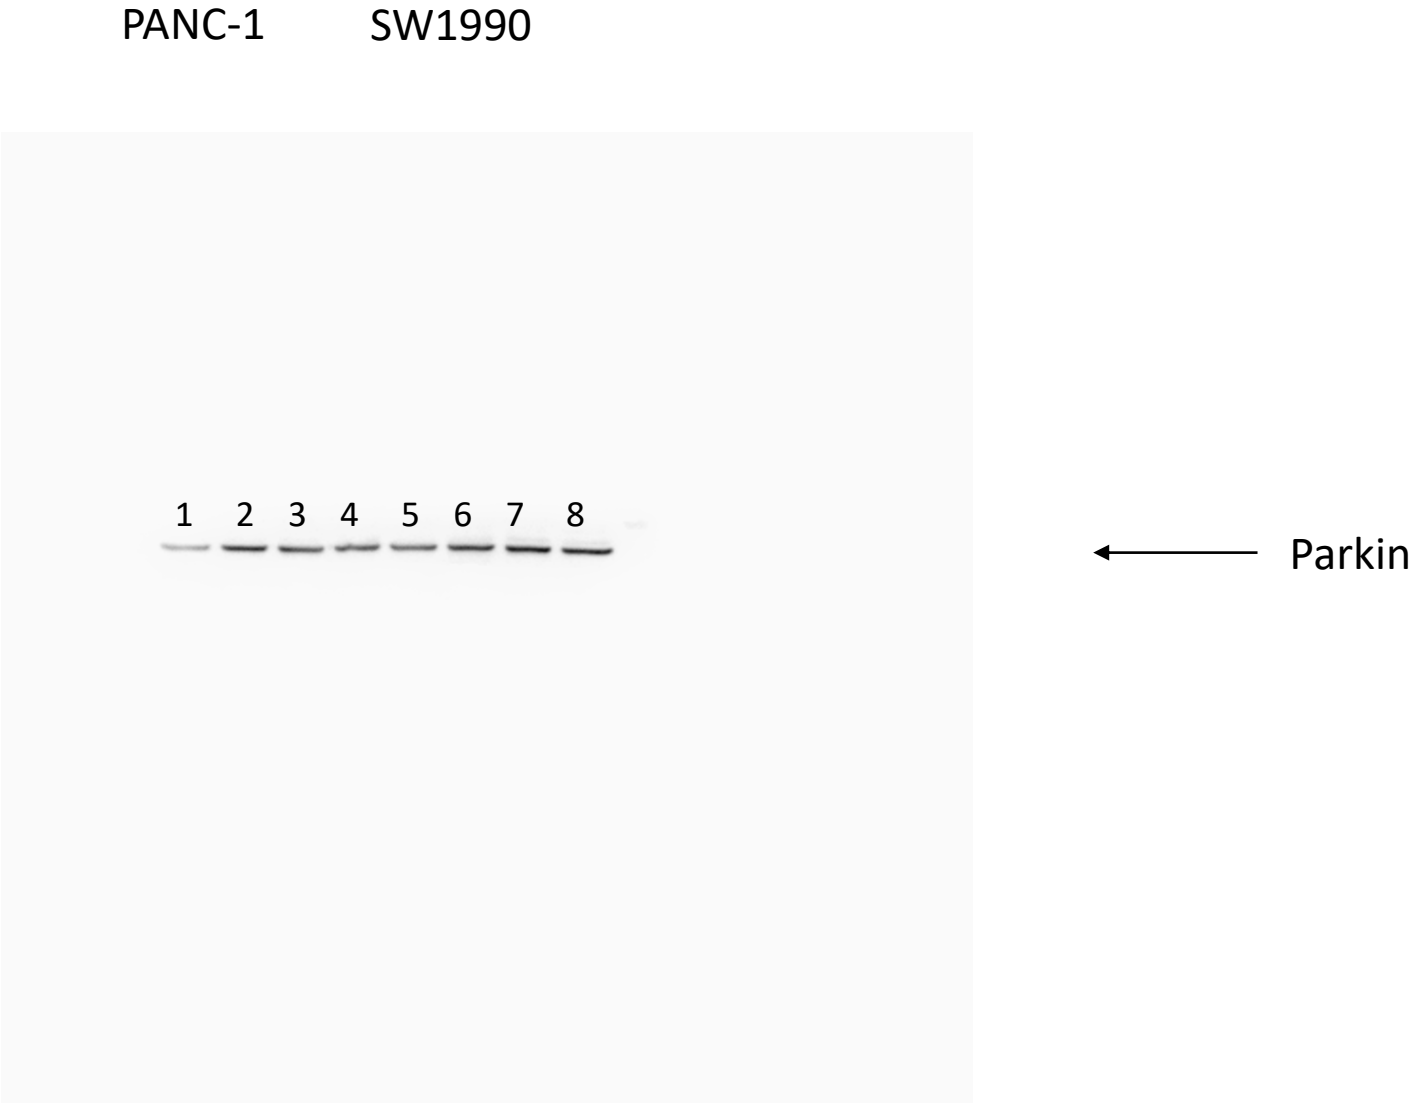

Full and uncropped western blot for Figure 3H

Lanes 1-8 are on the figure

PANC-1      SW1990

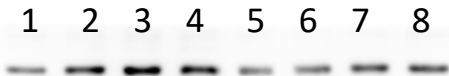

← BNIP3

Full and uncropped western blot for Figure 3H

Lanes 1-8 are on the figure

PANC-1      SW1990

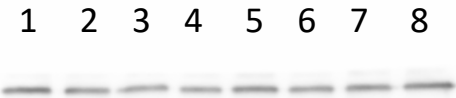

← GAPDH



Full and uncropped western blot for Figure 4A

Lanes 1-8 are on the figure

PANC-1      SW1990

1   2   3   4   5   6   7   8

←      Parkin

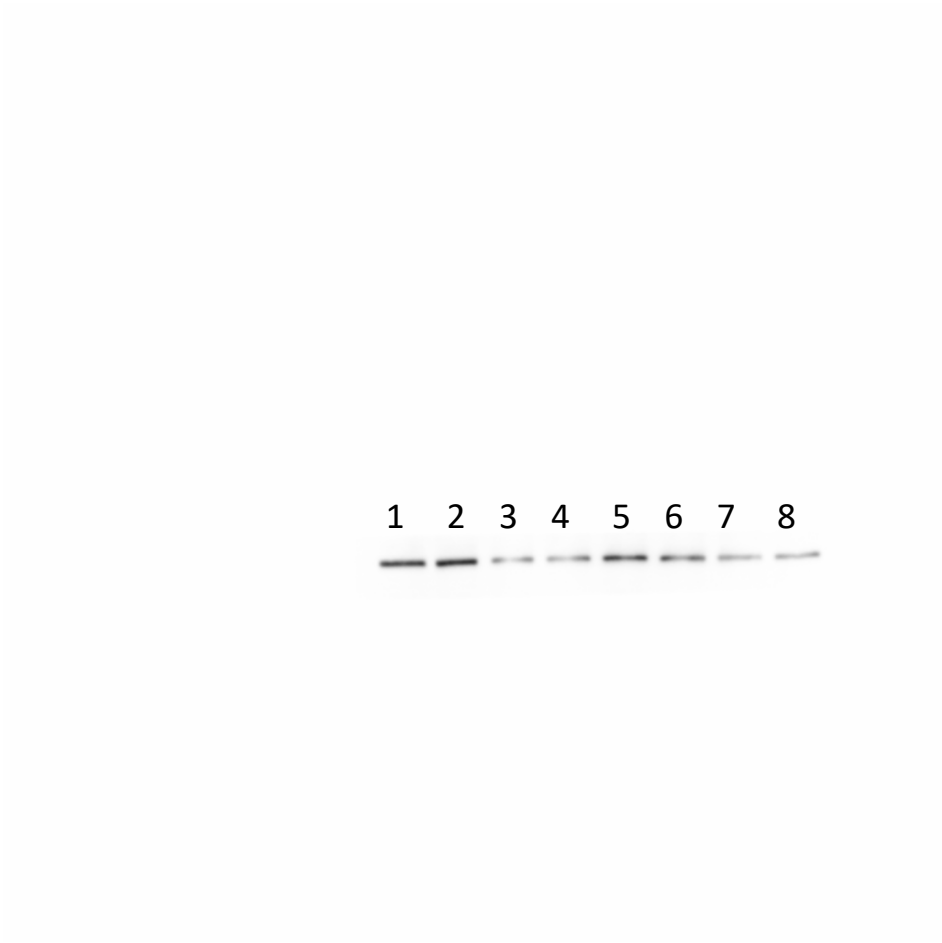

Full and uncropped western blot for Figure 4A

Lanes 1-8 are on the figure

PANC-1      SW1990

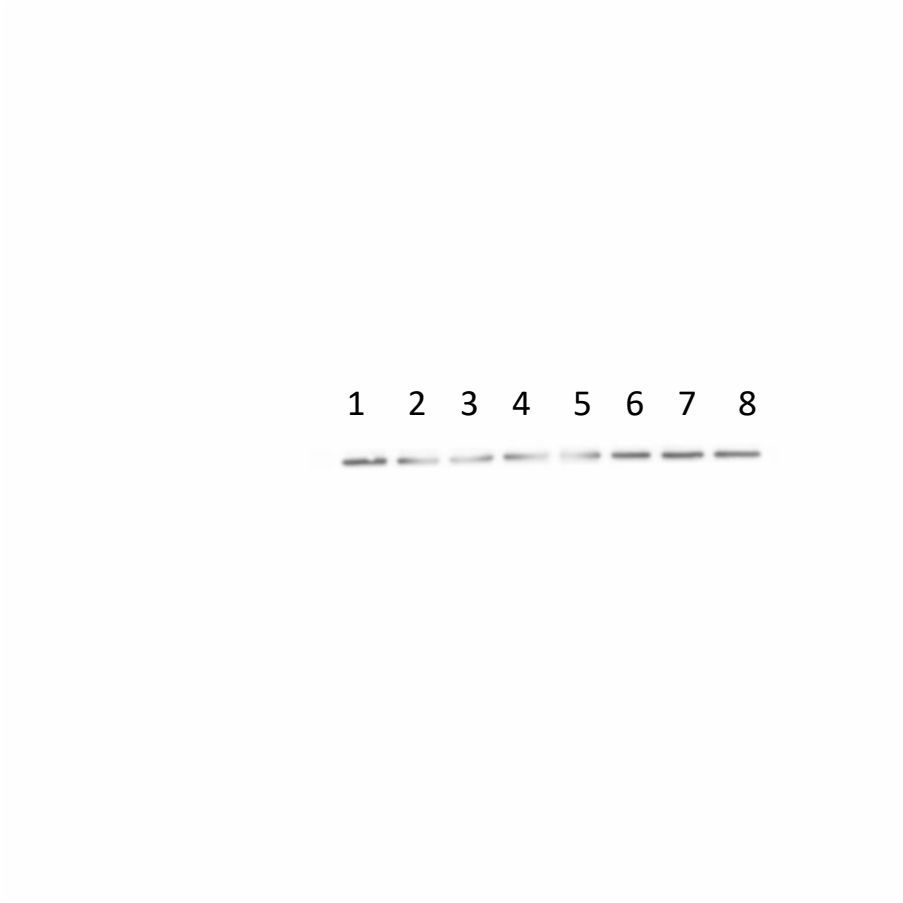

← GAPDH

Full and uncropped western blot for Figure 4A

Lanes 1-8 are on the figure

PANC-1      SW1990

1   2   3   4   5   6   7   8

← BNIP3

Full and uncropped western blot for Figure 4A

Lanes 1-8 are on the figure

PANC-1      SW1990

1   2   3   4   5   6   7   8



← GAPDH

Full and uncropped western blot for Figure 4H

Lanes 1-8 are on the figure

PANC-1      SW1990

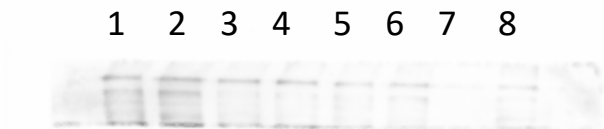

← Parkin

Full and uncropped western blot for Figure 4H

Lanes 1-8 are on the figure

PANC-1      SW1990

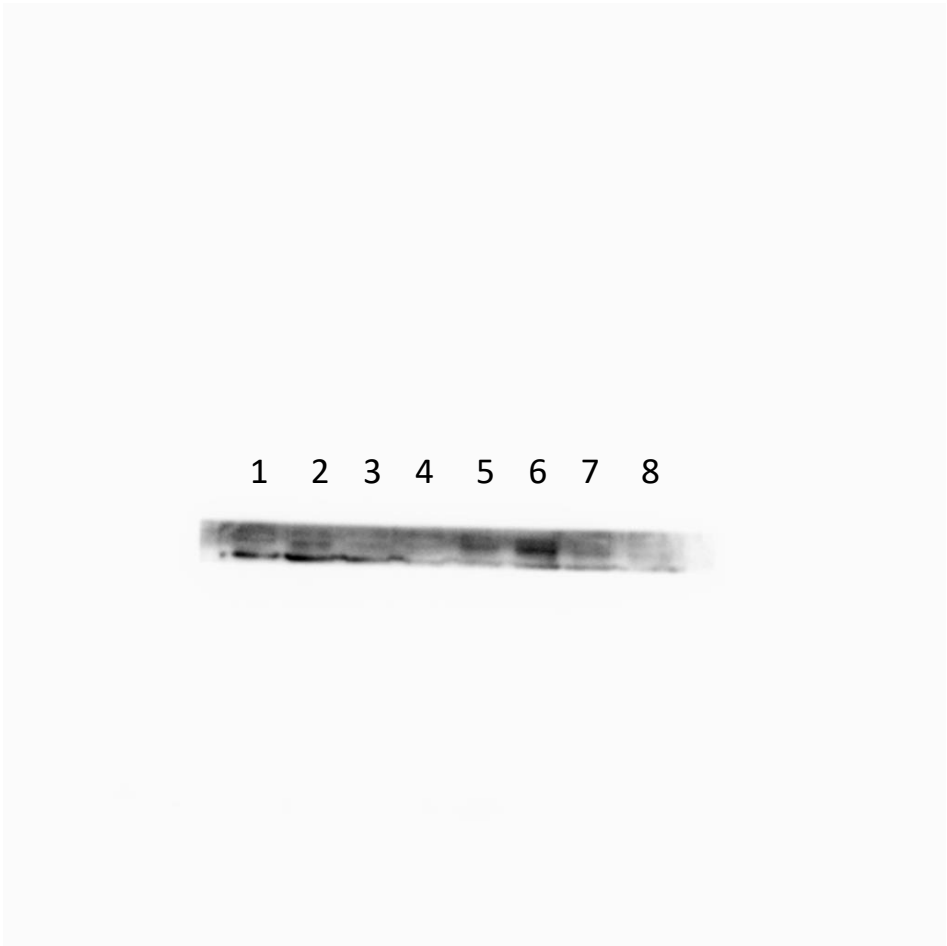

← γ-H2AX

Full and uncropped western blot for Figure 4H

Lanes 1-8 are on the figure

PANC-1      SW1990

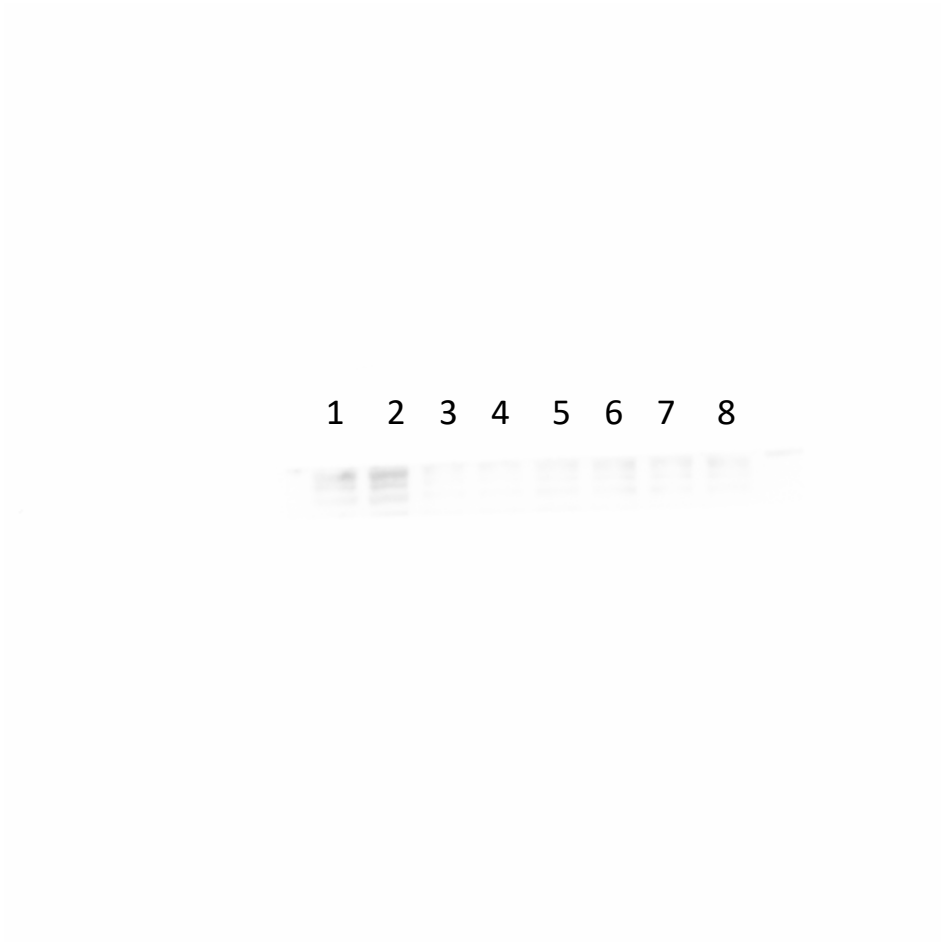

← 53BP1

Full and uncropped western blot for Figure 4H

Lanes 1-8 are on the figure

PANC-1      SW1990

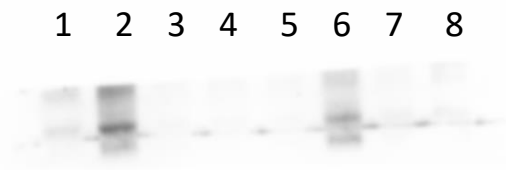

← PARP1



Full and uncropped western blot for Figure 4H

Lanes 1-8 are on the figure

PANC-1      SW1990

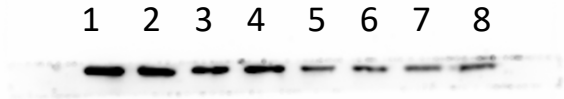

← GAPDH

Full and uncropped western blot for Figure 4H

Lanes 1-8 are on the figure

PANC-1      SW1990

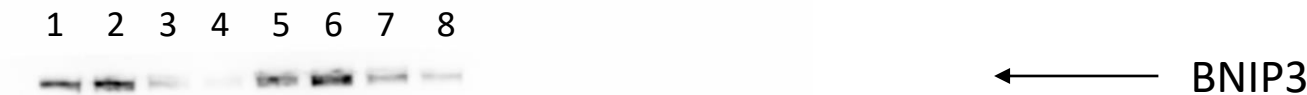

Full and uncropped western blot for Figure 4H

Lanes 1-8 are on the figure

PANC-1      SW1990

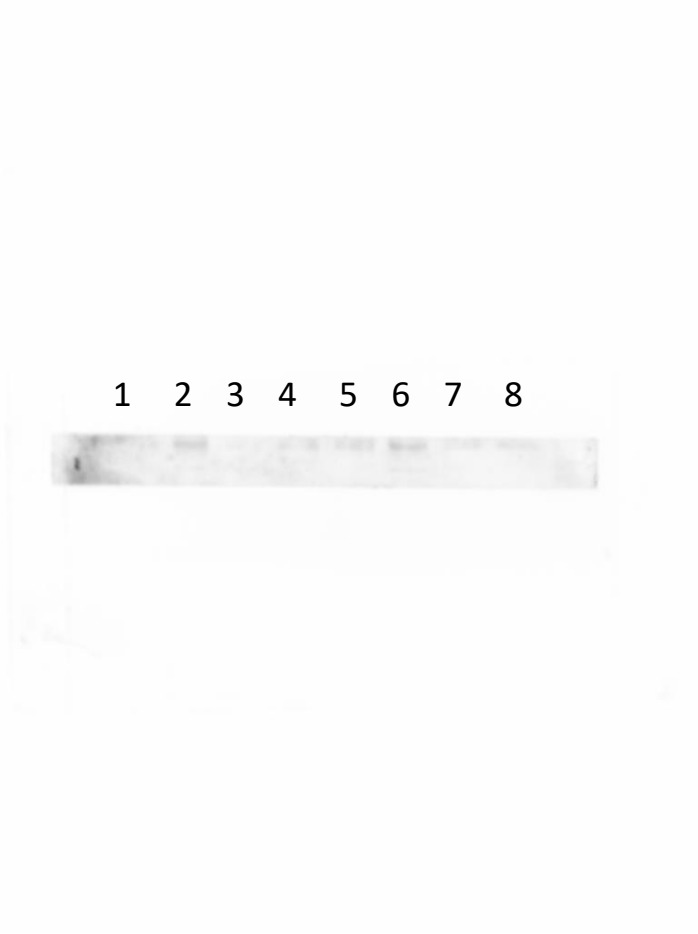

←  $\gamma$ -H2AX

Full and uncropped western blot for Figure 4H

Lanes 1-8 are on the figure

PANC-1      SW1990

1   2   3   4   5   6   7   8

← 53BP1

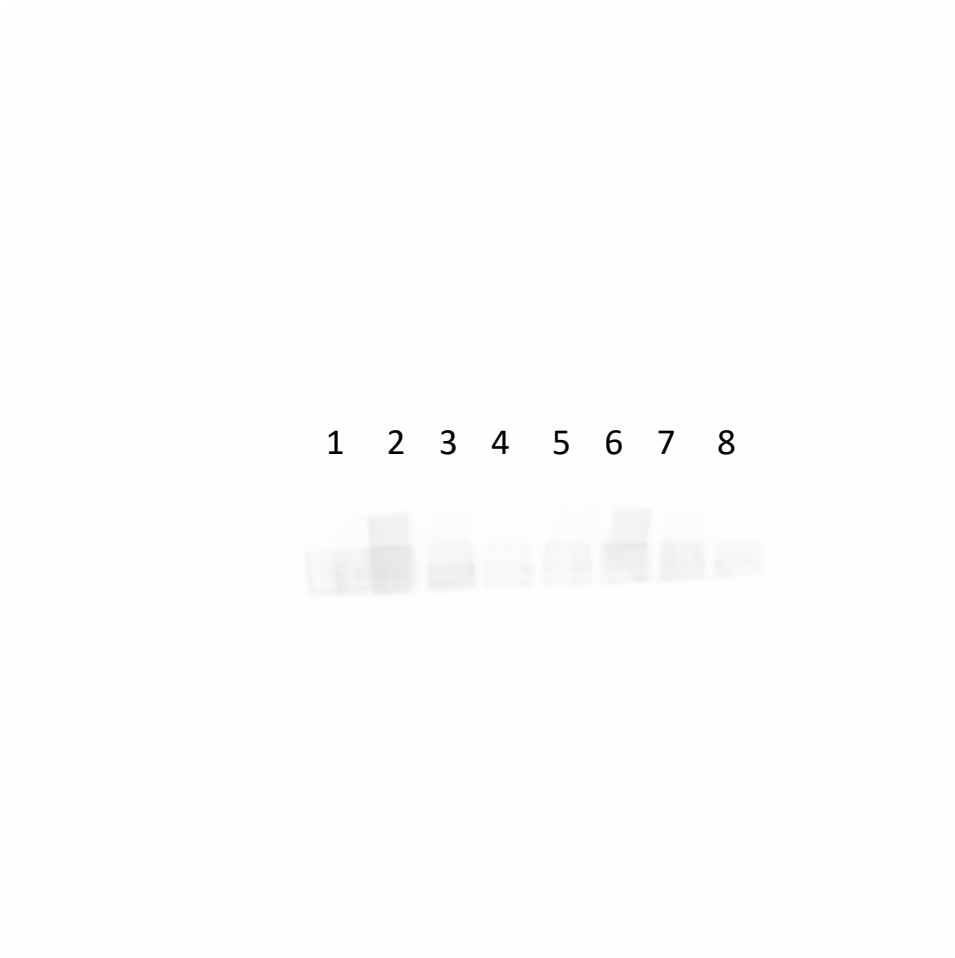

Full and uncropped western blot for Figure 4H

Lanes 1-8 are on the figure

PANC-1      SW1990

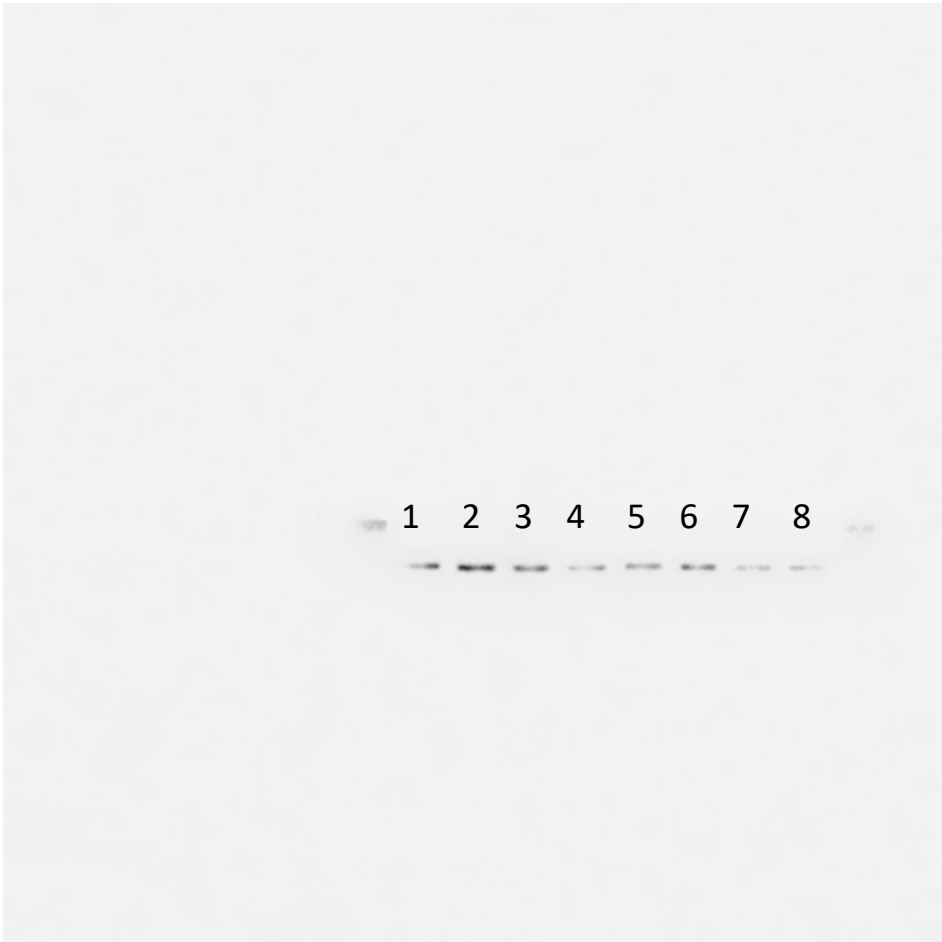

← PARP1

Full and uncropped western blot for Figure 4H

Lanes 1-8 are on the figure

PANC-1      SW1990

1   2   3   4   5   6   7   8

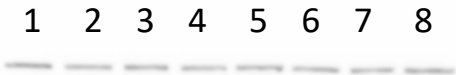

← GAPDH

Full and uncropped western blot for Figure 4I

Lanes 1-8 are on the figure

PANC-1      SW1990

1   2   3   4   5   6   7   8

← P-ATR

Full and uncropped western blot for Figure 4I

Lanes 1-8 are on the figure

PANC-1      SW1990

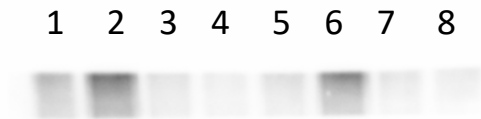

← ATR



Full and uncropped western blot for Figure 4I

Lanes 1-8 are on the figure

PANC-1      SW1990

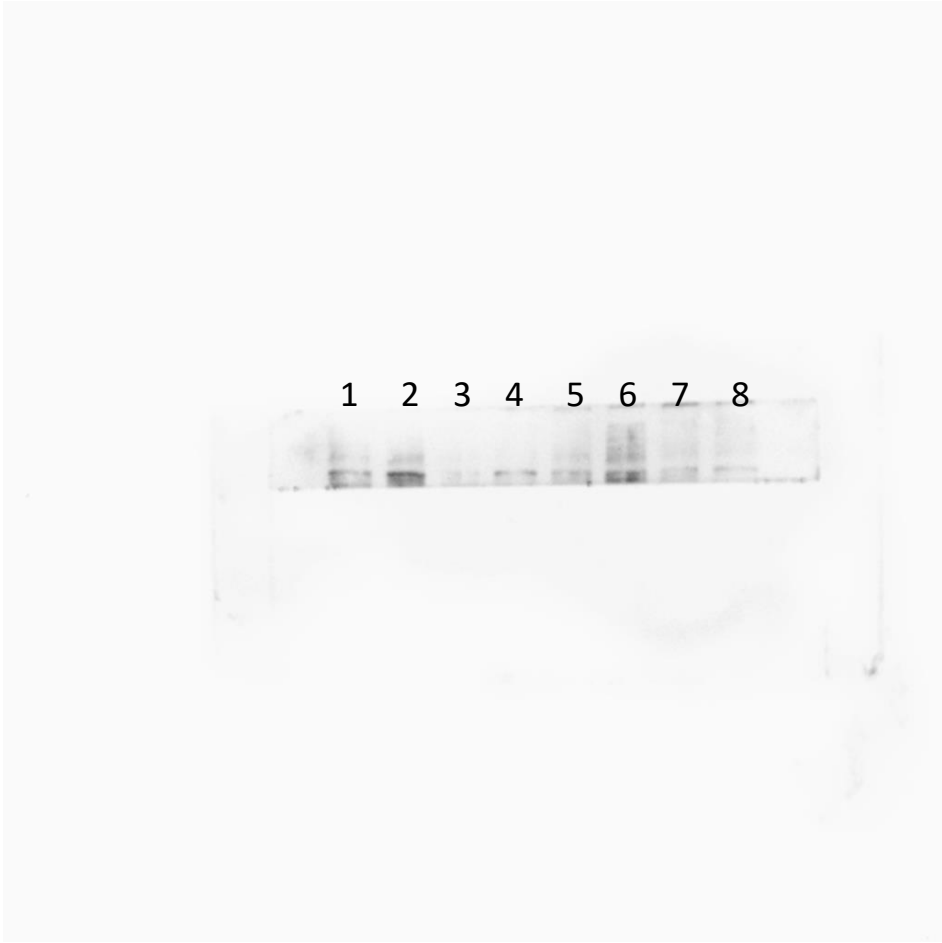

← P-ATM

Full and uncropped western blot for Figure 4I

Lanes 1-8 are on the figure

PANC-1      SW1990

1   2   3   4   5   6   7   8

← ATM

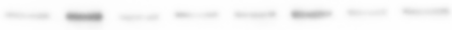

Full and uncropped western blot for Figure 4I

Lanes 1-8 are on the figure

PANC-1      SW1990

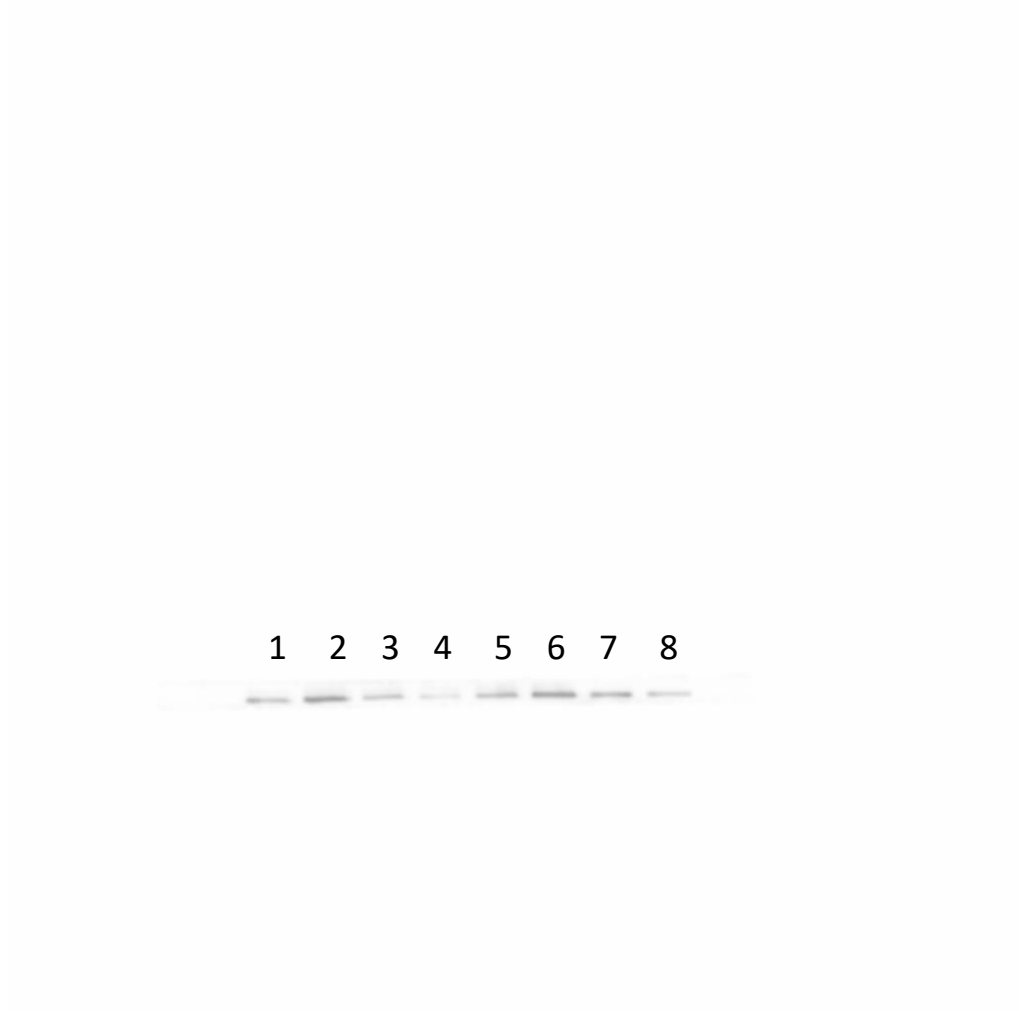

← P-BRCA1

Full and uncropped western blot for Figure 4I

Lanes 1-8 are on the figure

PANC-1      SW1990

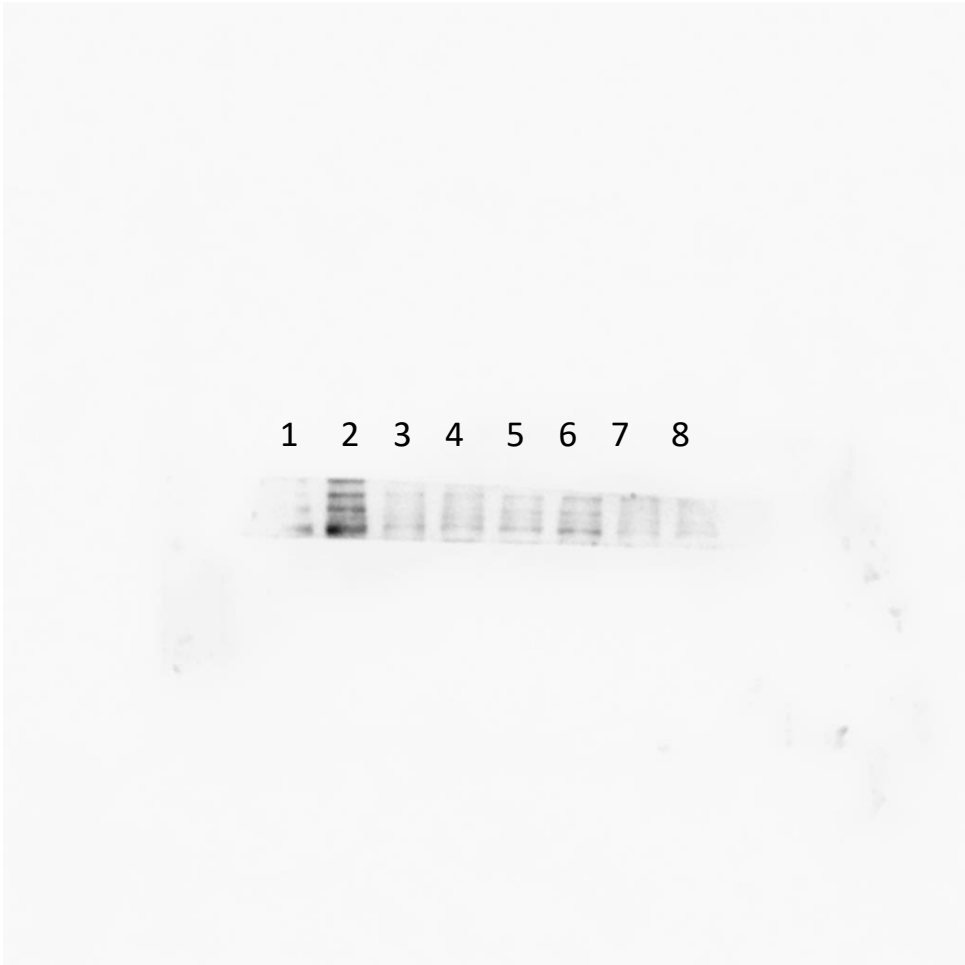

← BRCA1

Full and uncropped western blot for Figure 4I

Lanes 1-8 are on the figure

PANC-1      SW1990

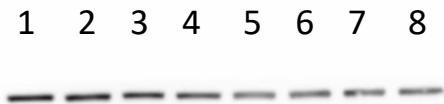

← GAPDH

Full and uncropped western blot for Figure 4I

Lanes 1-8 are on the figure

PANC-1      SW1990

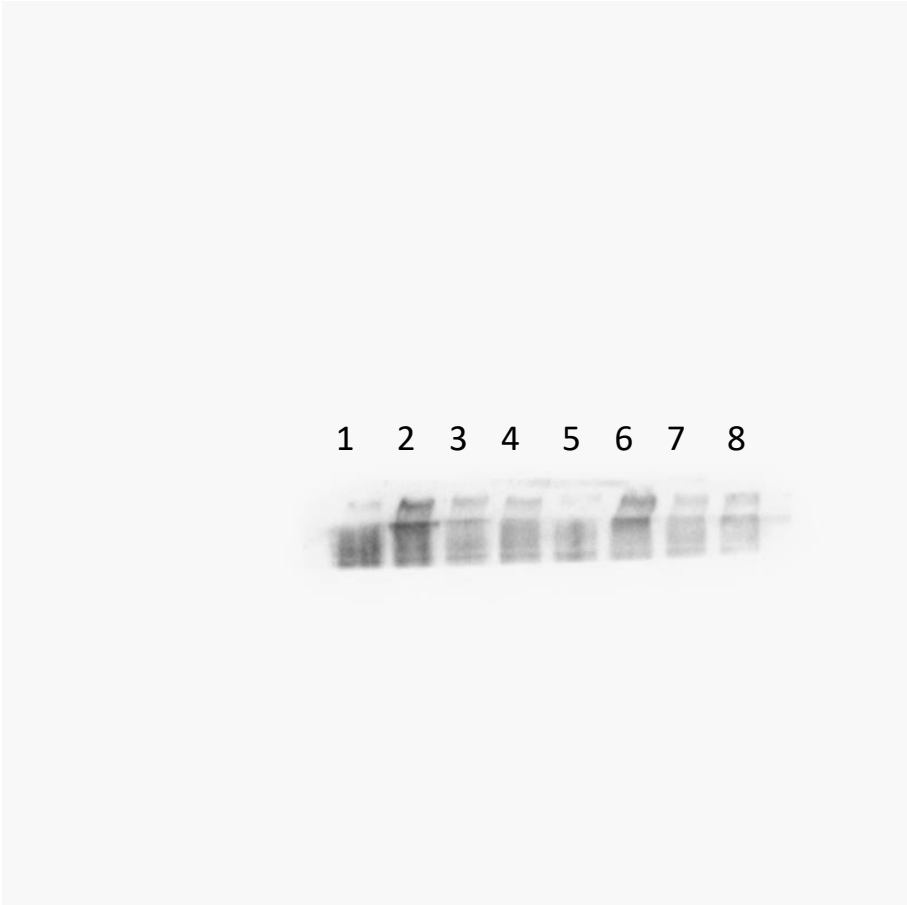

← P-ATR

Full and uncropped western blot for Figure 4I

Lanes 1-8 are on the figure

PANC-1      SW1990

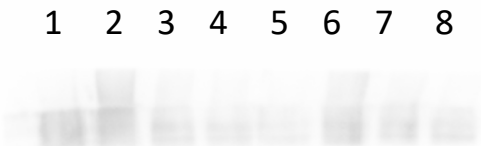

← ATR

Full and uncropped western blot for Figure 4I

Lanes 1-8 are on the figure

PANC-1      SW1990

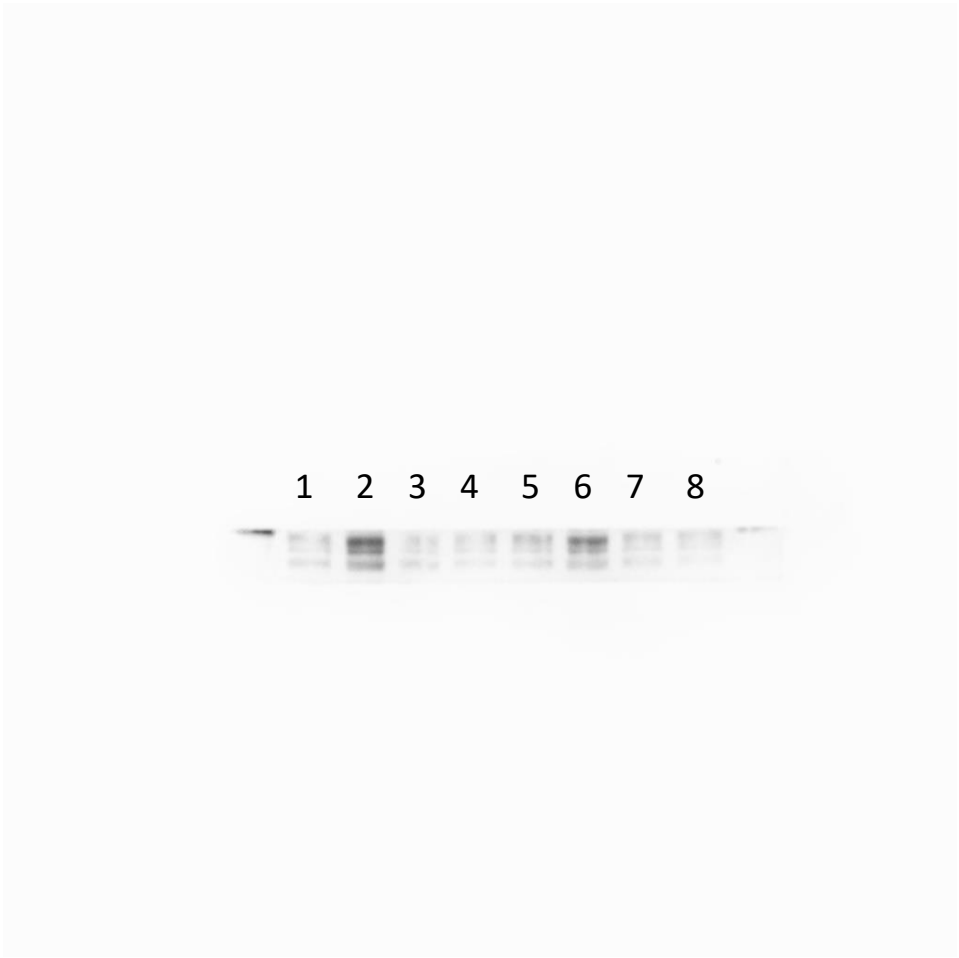

← P-ATM



Full and uncropped western blot for Figure 4I

Lanes 1-8 are on the figure

PANC-1      SW1990

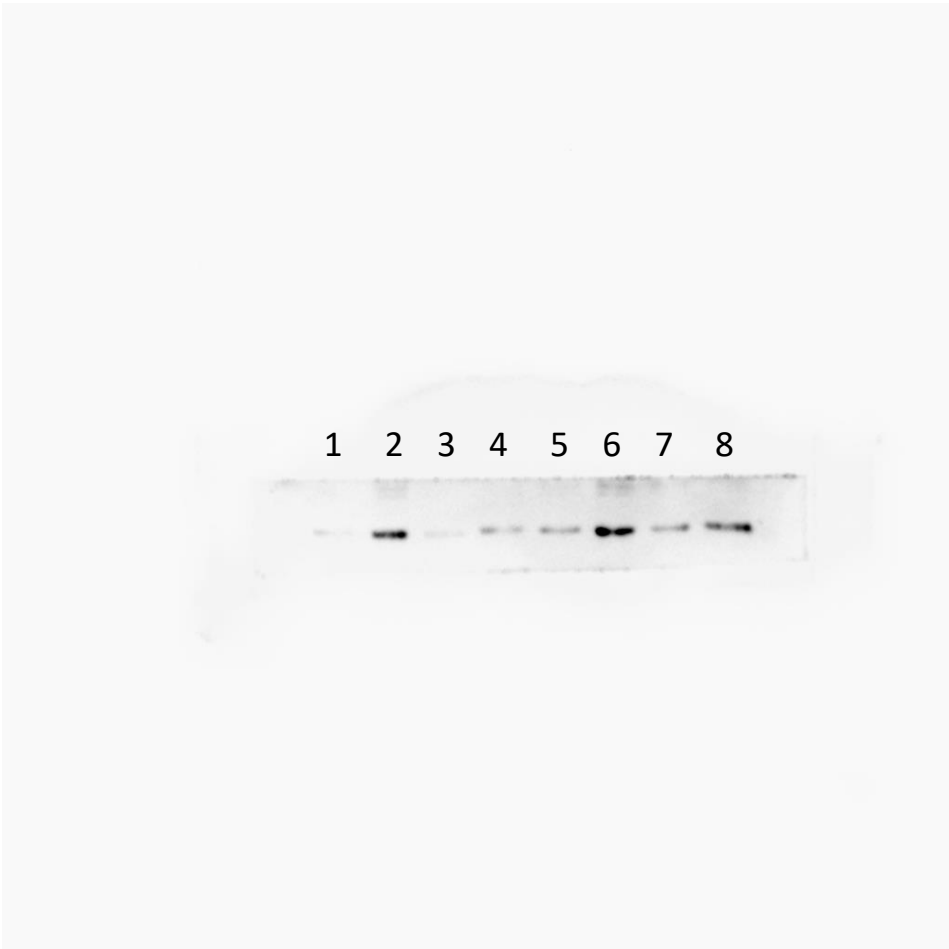

Full and uncropped western blot for Figure 4I

Lanes 1-8 are on the figure

PANC-1      SW1990

1   2   3   4   5   6   7   8

← P-BRCA1

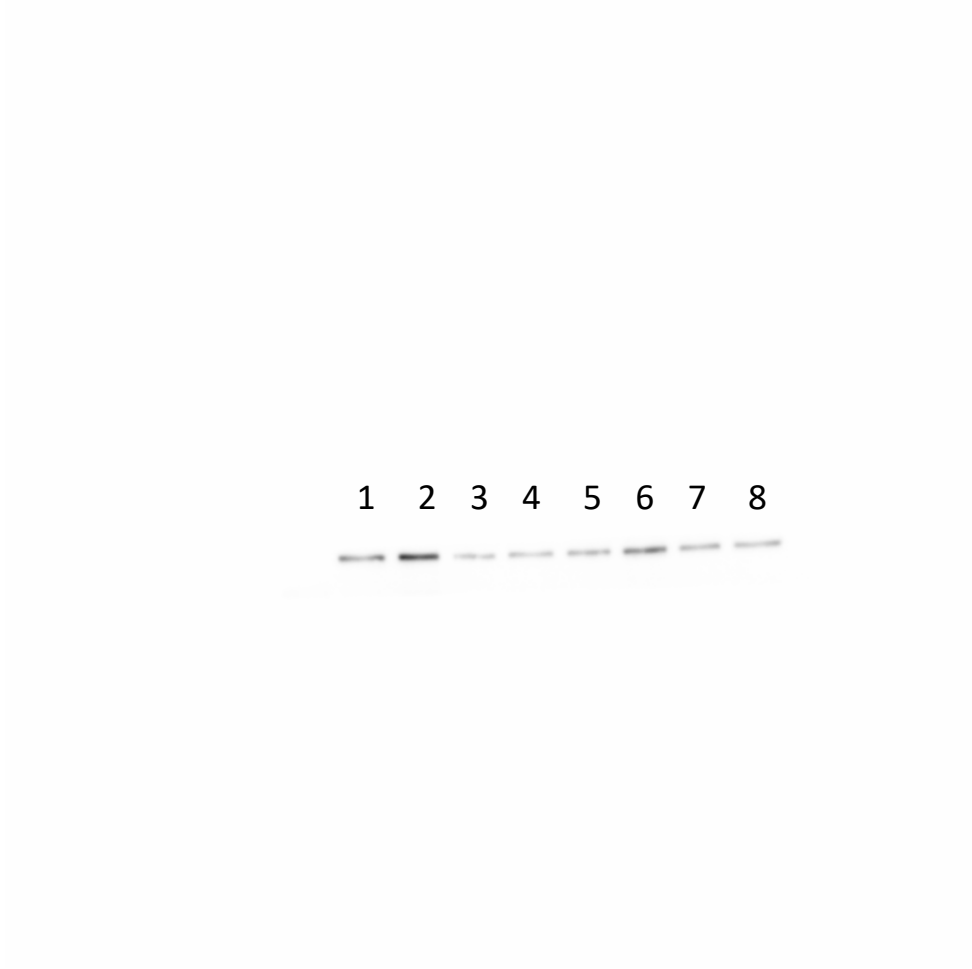

Full and uncropped western blot for Figure 4I

Lanes 1-8 are on the figure

PANC-1      SW1990

1   2   3   4   5   6   7   8

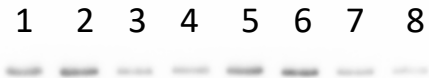

The image shows a western blot with 8 lanes. Lanes 1-4 are labeled PANC-1 and lanes 5-8 are labeled SW1990. The lanes are numbered 1 through 8. An arrow on the right points to the BRCA1 band. The bands are visible in all lanes, with varying intensities.

← BRCA1

Full and uncropped western blot for Figure 4I

Lanes 1-8 are on the figure

PANC-1      SW1990

1   2   3   4   5   6   7   8

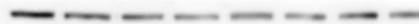

← GAPDH

Full and uncropped western blot for Figure 4J

Lanes 1-8 are on the figure

PANC-1      SW1990

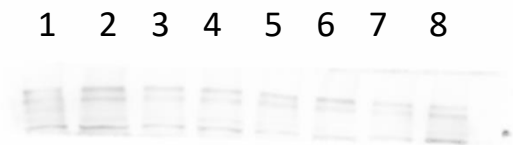

← P-ATR

Full and uncropped western blot for Figure 4J

Lanes 1-8 are on the figure

PANC-1      SW1990

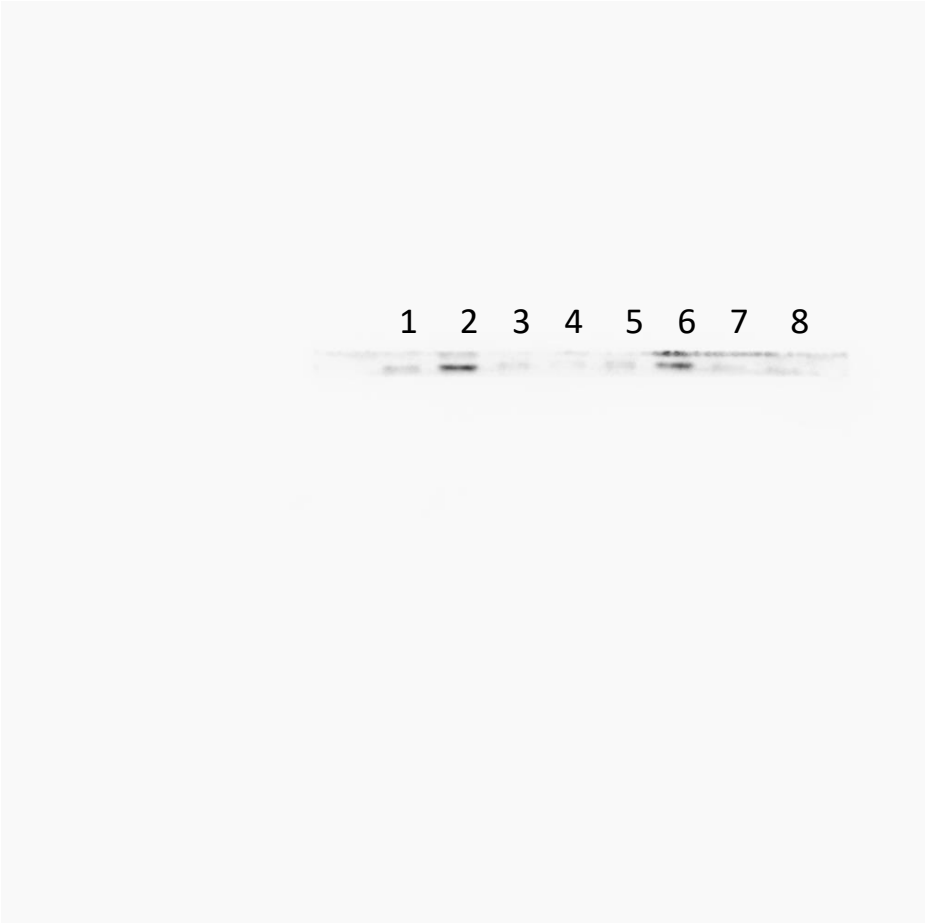

← ATR

Full and uncropped western blot for Figure 4J

Lanes 1-8 are on the figure

PANC-1      SW1990

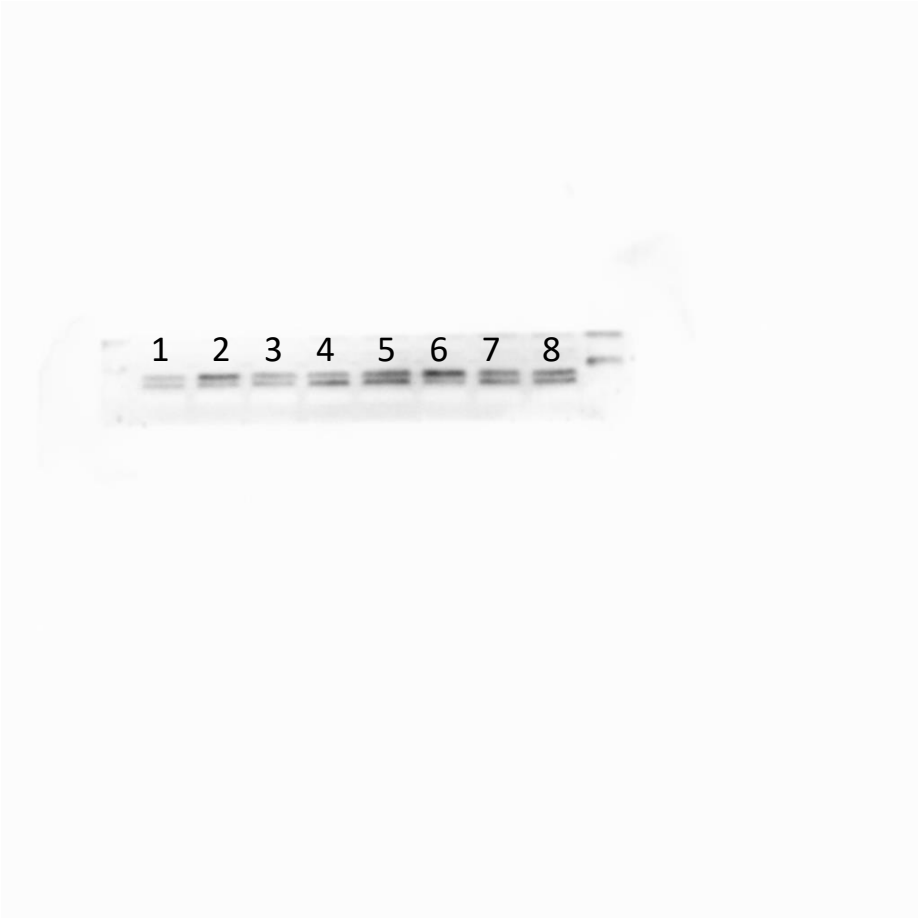

← P-CHK1

Full and uncropped western blot for Figure 4J

Lanes 1-8 are on the figure

PANC-1      SW1990

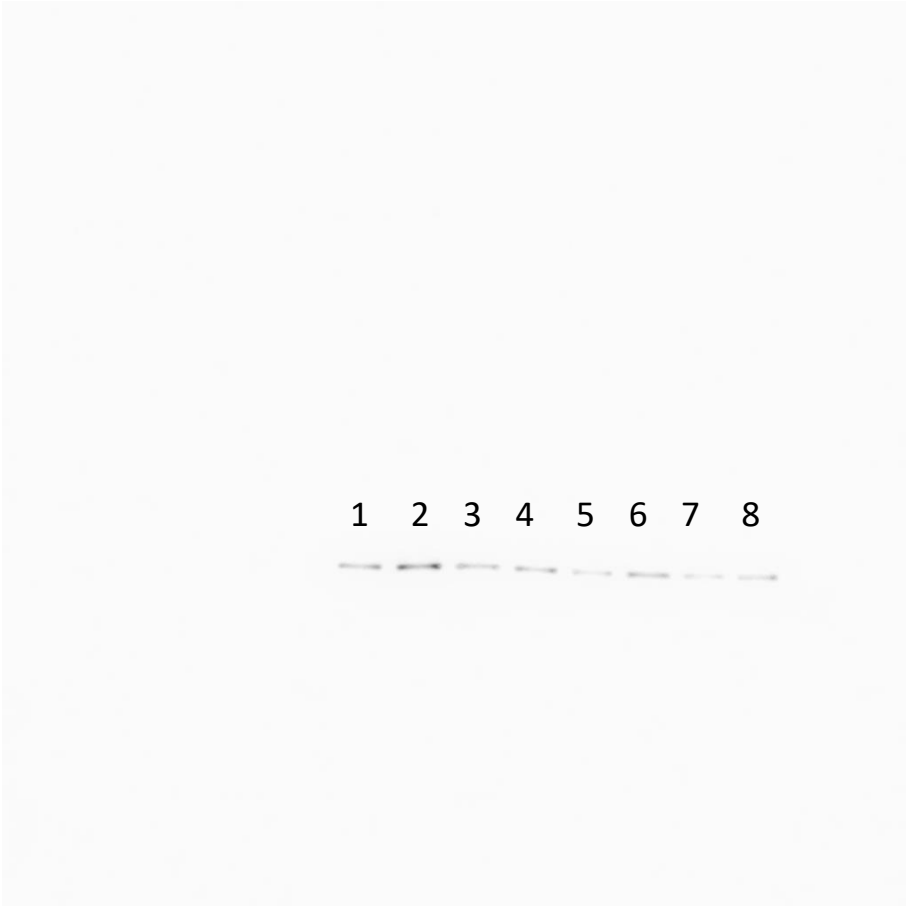

← CHK1



Full and uncropped western blot for Figure 4J

Lanes 1-8 are on the figure

PANC-1      SW1990

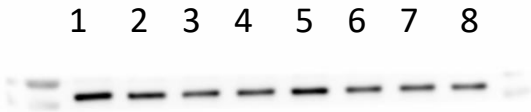

← GAPDH

Full and uncropped western blot for Figure 4K

Lanes 1-8 are on the figure

PANC-1      SW1990

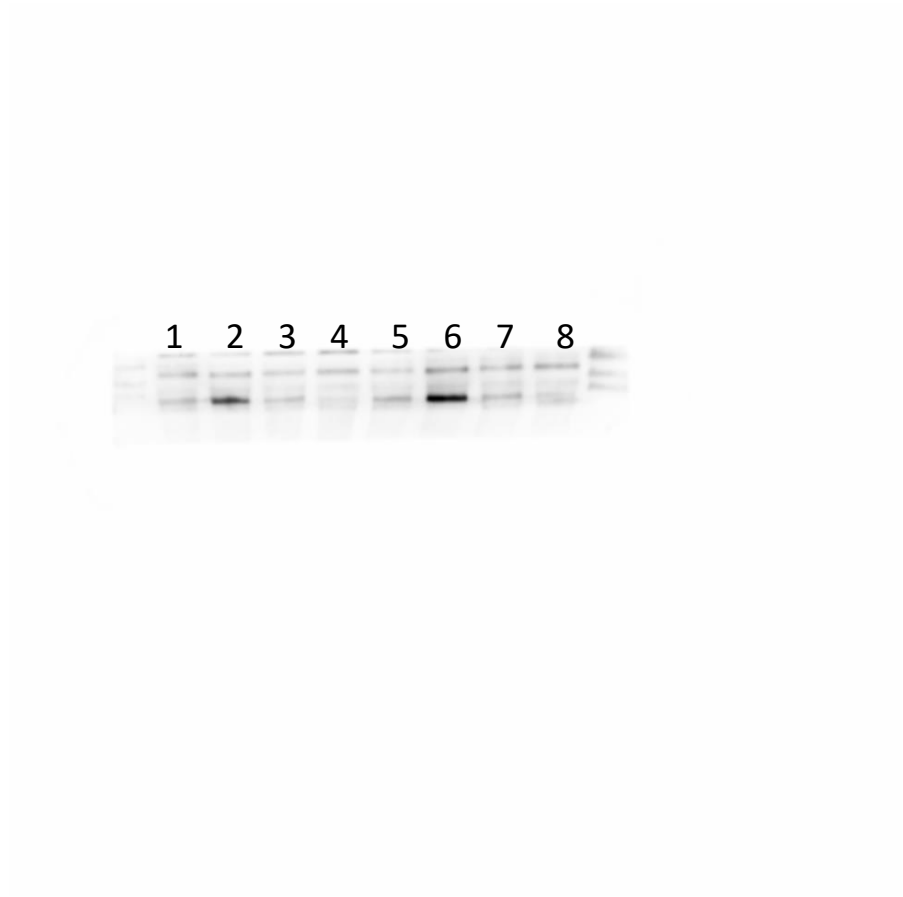

← P-ATM

Full and uncropped western blot for Figure 4K

Lanes 1-8 are on the figure

PANC-1      SW1990

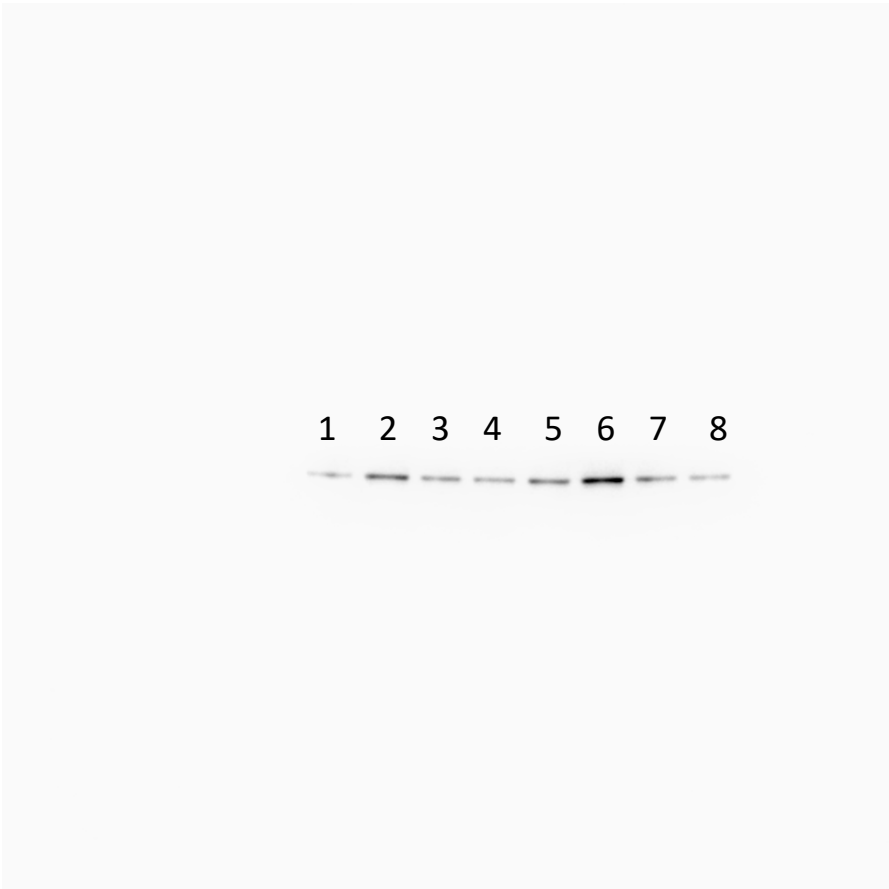

← ATM

Full and uncropped western blot for Figure 4K

Lanes 1-8 are on the figure

PANC-1      SW1990

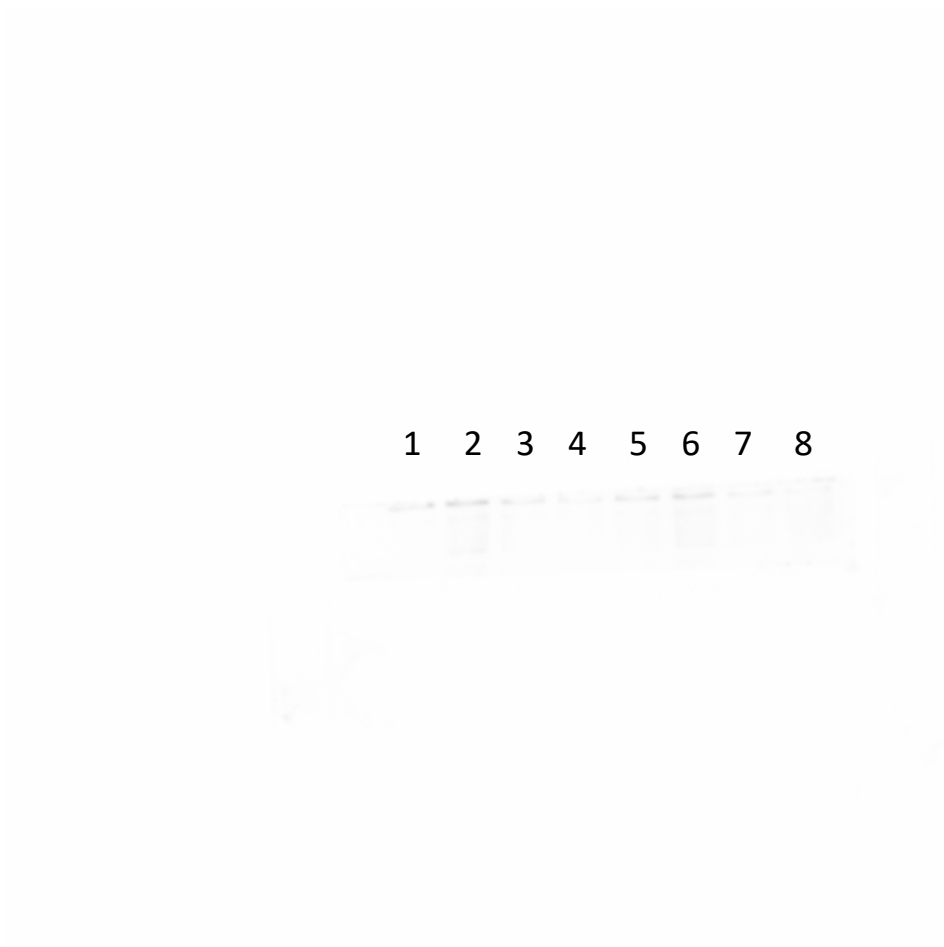

← P-CHK2

Full and uncropped western blot for Figure 4K

Lanes 1-8 are on the figure

PANC-1      SW1990

1   2   3   4   5   6   7   8



← CHK2

Full and uncropped western blot for Figure 4K

Lanes 1-8 are on the figure

PANC-1      SW1990

1   2   3   4   5   6   7   8

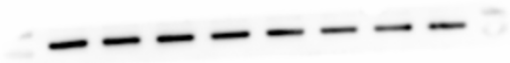

← GAPDH

Full and uncropped western blot for Figure 4L

Lanes 1-8 are on the figure

PANC-1      SW1990

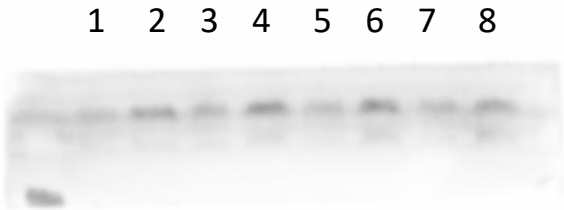

← Parkin

Full and uncropped western blot for Figure 4L

Lanes 1-8 are on the figure

PANC-1      SW1990

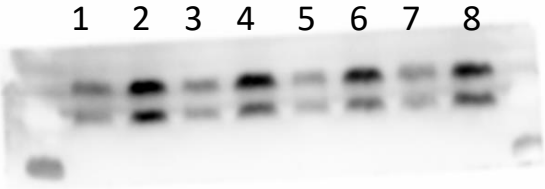

← BNIP3



Full and uncropped western blot for Figure 4L

Lanes 1-8 are on the figure

PANC-1      SW1990

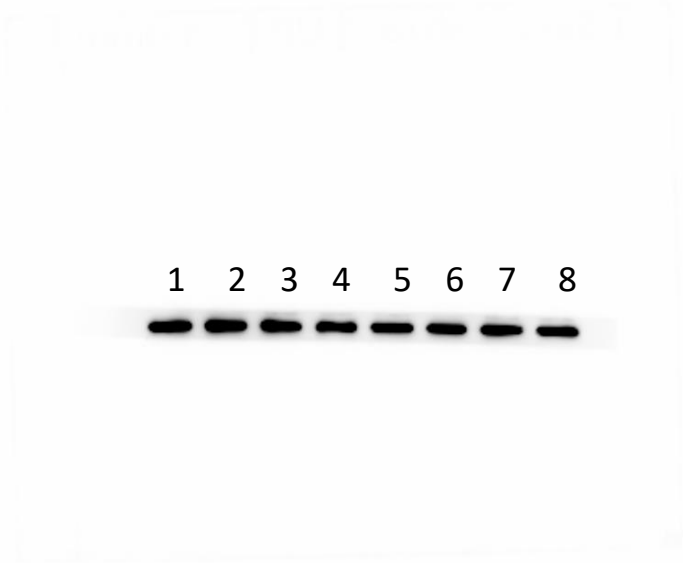

← GAPDH

Full and uncropped western blot for Figure 4M

Lanes 1-8 are on the figure

PANC-1      SW1990

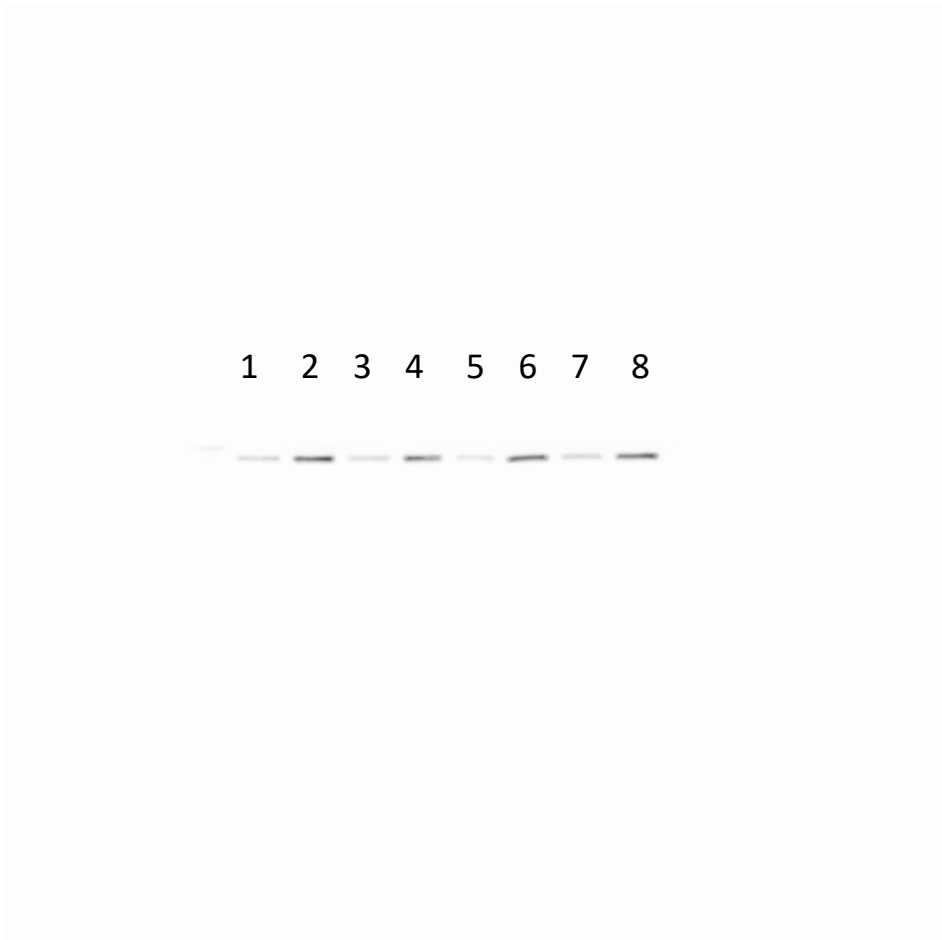

Full and uncropped western blot for Figure 4M

Lanes 1-8 are on the figure

PANC-1      SW1990

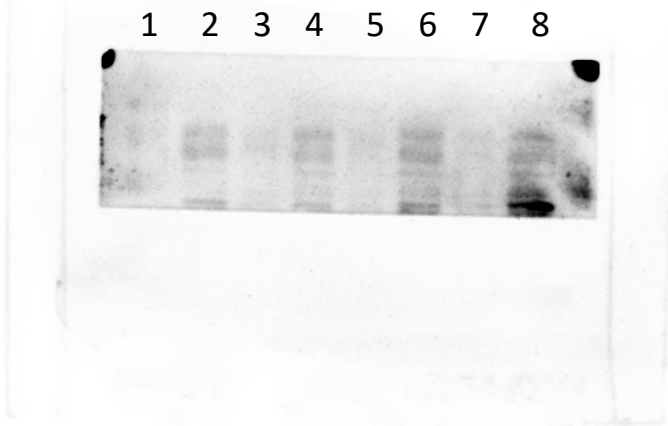

← BNIP3

Full and uncropped western blot for Figure 4M

Lanes 1-8 are on the figure

PANC-1      SW1990

1   2   3   4   5   6   7   8

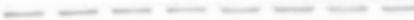

← GAPDH

Full and uncropped western blot for Figure 5A

Lanes 1-8 are on the figure

B16

S91

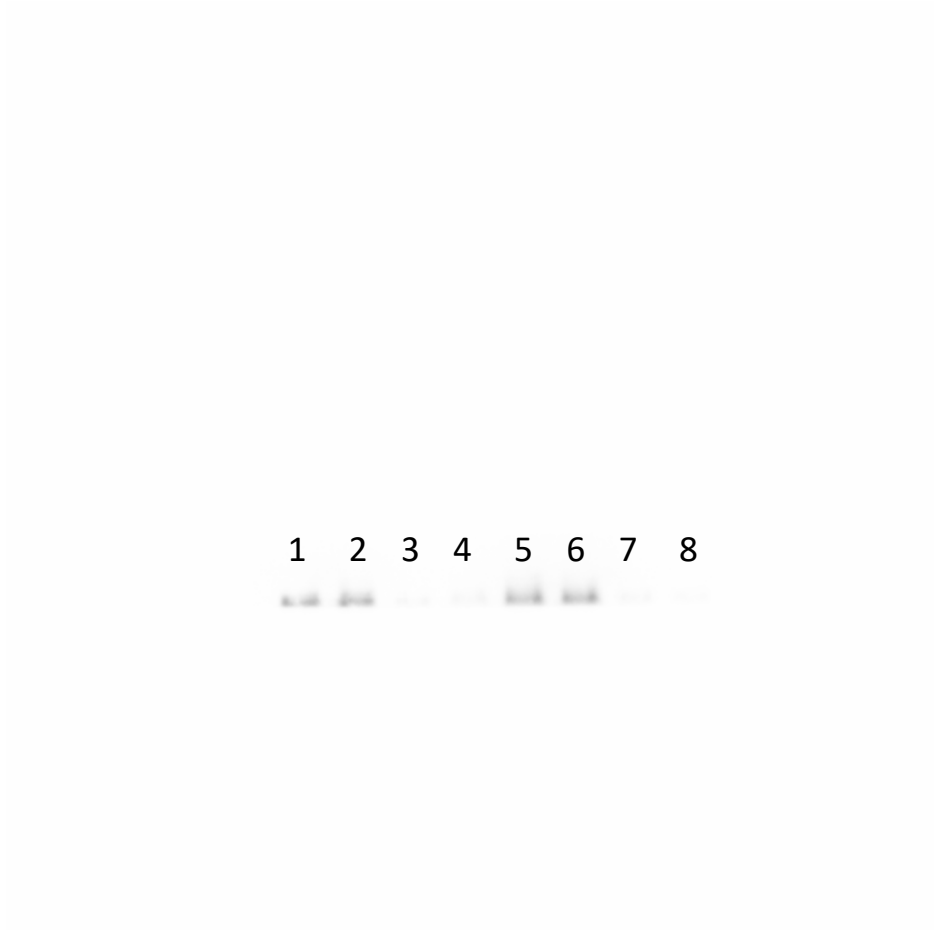

← Parkin

Full and uncropped western blot for Figure 5A

Lanes 1-8 are on the figure

B16                      S91

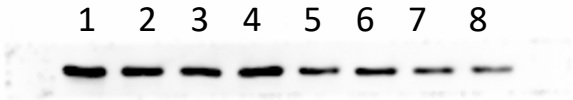

← GAPDH

Full and uncropped western blot for Figure 5A

Lanes 1-8 are on the figure

B16

S91

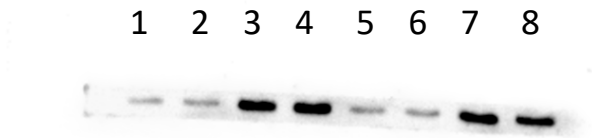

← Parkin

Full and uncropped western blot for Figure 5A

Lanes 1-8 are on the figure

B16                      S91

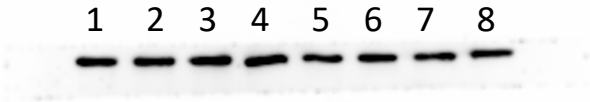

← GAPDH
